# Supplementary material for: Wildfire Impact on Indoor and Outdoor PAH Air Quality
Source: PubMed Central journal article supplement — Environ Sci Technol. 2022 Jul 8;56(14):10042–52. doi: 10.1021/acs.est.2c00619 (PMC9301925; doi:10.1021/acs.est.2c00619), 2022-07-08
Supplement: es2c00619_si_001.pdf [file es2c00619_si_001.pdf]

# Wildfire impact on indoor and outdoor PAH air quality

## Environmental Science & Technology

Christine C. Ghetu<sup>1</sup>, Diana Rohlman<sup>2</sup>, Brian W. Smith<sup>1</sup>, Richard P. Scott<sup>1</sup>, Kaley A. Adams<sup>1</sup>, Peter D. Hoffman<sup>1</sup>, Kim A. Anderson\*<sup>1</sup>

<sup>1</sup> Food Safety and Environmental Stewardship Program, Department of Environmental and Molecular Toxicology, Oregon State University, 1007 Ag. and Life Sciences Building, Corvallis, Oregon, USA

<sup>2</sup> College of Public Health and Human Sciences, Oregon State University, Corvallis, OR 97331, USA

\* corresponding author kim.anderson@oregonstate.edu

## Supporting Information

| Table                                                                                                       | Page # |
|-------------------------------------------------------------------------------------------------------------|--------|
| <b>Table S1.</b> Performance reference compound mass per strip (n=3)                                        | S2     |
| <b>Table S2.</b> Mean concentration (ng/mL) for quality control samples                                     | S2     |
| <b>Table S3.</b> Unsubstituted PAH physicochemical properties                                               | S3-4   |
| <b>Table S4.</b> Instrument parameters                                                                      | S4     |
| <b>Table S5.</b> IUR and RfC values for risk assessment                                                     | S6     |
| <b>Table S6.</b> U.S. EPA AQI values before wildfires                                                       | S7-8   |
| <b>Table S7.</b> U.S. EPA AQI values during wildfires                                                       | S8     |
| <b>Table S8.</b> U.S. EPA AQI values after wildfires                                                        | S9     |
| <b>Table S9.</b> NOAA hazard mapping smoke impact before wildfires                                          | S10    |
| <b>Table S10.</b> NOAA hazard mapping smoke impact during wildfires                                         | S11    |
| <b>Table S11.</b> NOAA hazard mapping smoke impact after wildfires                                          | S12    |
| <b>Table S12.</b> Wildfire activity information during sampling                                             | S13-14 |
| <b>Table S13.</b> Participant survey responses                                                              | S15    |
| <b>Table S14.</b> PAH air concentrations (ng/m <sup>3</sup> ) before wildfires                              |        |
| <b>a)</b> Before wildfires indoor                                                                           | S16-17 |
| <b>b)</b> Before wildfires outdoor                                                                          | S17-19 |
| <b>Table S15.</b> PAH air concentrations (ng/m <sup>3</sup> ) during wildfires                              |        |
| <b>a)</b> During wildfires indoor                                                                           | S20-21 |
| <b>b)</b> During wildfires outdoor                                                                          | S21-23 |
| <b>Table S16.</b> PAH air concentrations (ng/m <sup>3</sup> ) after wildfires                               |        |
| <b>a)</b> After wildfires indoor                                                                            | S24-25 |
| <b>b)</b> After wildfires outdoor                                                                           | S25-27 |
| <b>Table S17.</b> Relative standard deviation of replicate analysis in Newport, OR                          | S28    |
| <b>Table S18.</b> Inhalation PAH excess lifetime cancer risk estimations before, during and after wildfires | S31    |
| <b>Table S29.</b> Inhalation PAH hazard quotient estimations before, during and after wildfires             | S32    |

| Figure                                                                                                       | Page # |
|--------------------------------------------------------------------------------------------------------------|--------|
| <b>Figure S1.</b> Wildfire sampling kit materials for community members                                      | S1     |
| <b>Figure S2.</b> Examples of report back materials                                                          | S1     |
| <b>Figure S3.</b> Vapor-phase PAH concentrations before, during and after wildfire                           | S29    |
| <b>Figure S4.</b> Indoor and outdoor vapor-phase PAH concentrations) before b) during and c) after wildfires | S30    |

| Calculations                                                  | Page # |
|---------------------------------------------------------------|--------|
| <b>PAH environmental calculations</b>                         | S5     |
| <b>Calculations for cancer and non-cancer risk assessment</b> | S5-6   |
| <b>Air Quality Index (AQI) and NOAA smoke density</b>         | S7     |

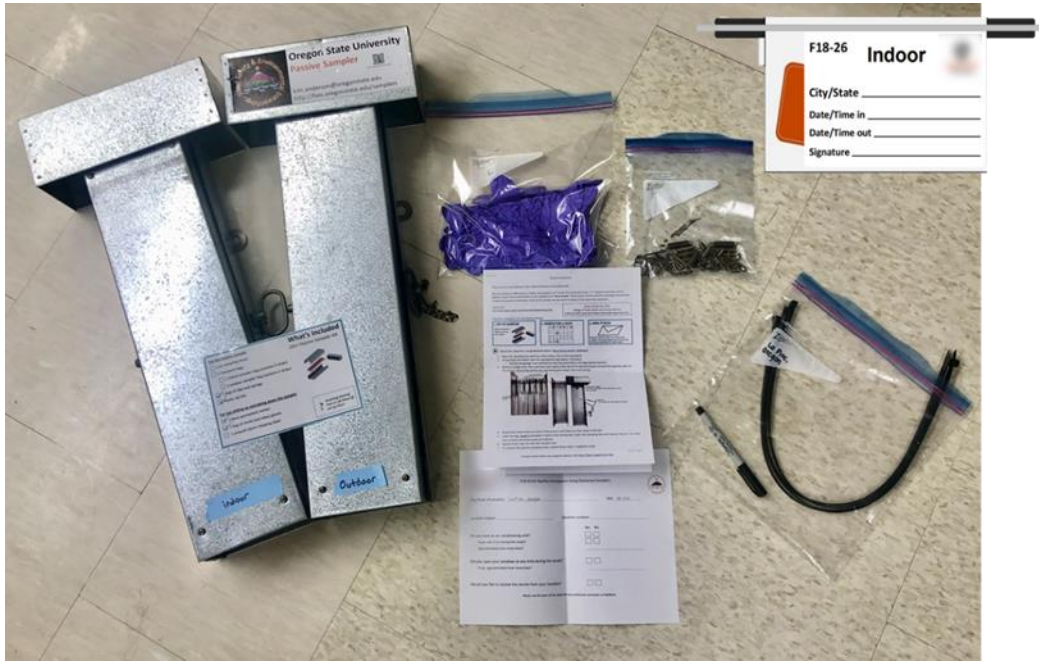

**Figure S1.** Wildfire sampling kit materials for community members.

Sampling kits include 2 air cages and two sets of passive sampling strips (one for indoor and one for outdoor), a checklist of all kit materials, gloves to deploy and retrieve passive samplers, springs and clips to deploy samplers in the cages, an instruction packet, a paper survey, permanent marker to record all information and zip-ties to attach the outdoor sampling cage to a fence or tree. The Food Safety and Environmental Stewardship logo was created by and is the property of Dr. Kim Anderson.

### Wildfire Air Quality Study

Food Safety and Environmental Stewardship Laboratory  
Initiated August 2018

**WHERE WE SAMPLED**

(2018) We sampled in 13 locations in 4 states. Washington, Oregon, Idaho & California

**Who We Are**  
The Food Safety and Environmental Stewardship Laboratory is a research program. One research focus is expanding knowledge related to human safety and chemical exposures and environmental integrity preservation.

**Why Wildfire Research**  
Wildfires in the Pacific Northwest are happening more often and lasting longer. Smoke from wildfires has resulted in poor air quality even miles away from an active fire.

**What We Are Doing**  
Working with interested community members, we placed air samplers (🏠) in four states during and after wildfires in the Pacific Northwest. Each location had one indoor and one outdoor sampler. This allows us to see how air quality may be the same or different inside or outside.

After one month, samplers were analyzed for a specific type of air pollution, a class of chemicals called polycyclic aromatic hydrocarbons (PAHs). > <https://superfund.oregonstate.edu/all-about-pahs>

**Our Preliminary Findings**  
We found that PAH concentrations were generally higher indoors than outdoors, possibly due to lower ventilation. Additional potential sources of PAHs in the home may be due to cooking, use of candles/incense and even certain types of naphthalene-based air fresheners.

We found more types of PAHs outdoors. This may be due to the many different types of sources (vehicle exhaust, forest fires, pollution, etc.)

We will be sampling again in the summer of 2019.

**CONTACT US**  
Diana Rohlman  
E: [diana.rohlman@oregonstate.edu](mailto:diana.rohlman@oregonstate.edu)  
T: 541-357-8577

OREGON STATE UNIVERSITY  
• Kim Anderson, PhD  
• Diana Rohlman, PhD

OSU FOOD SAFETY AND ENVIRONMENTAL STEWARDSHIP  
Funding provided by the Food Safety and Environmental Stewardship Laboratory, directed by Dr. Kim Anderson.

Version date: July 2019

### POLYCYCLIC AROMATIC HYDROCARBONS

Common environmental pollutants

**PAHs...**  
Are a class of over 1000 chemicals  
Have few regulations for outdoor air  
Are contributors to pollution  
Are found in the environment

**Do PAHs AFFECT HUMAN HEALTH?**  
PAHs are a human health concern, although much is still unknown. The level of concern depends on several factors:

1. EXPOSURE (i.e., breathing, eating, drinking)
2. AMOUNT OF PAHs
3. PAH TYPES
4. LENGTH OF EXPOSURE
5. SUSCEPTIBILITY (genetics, age, pregnancy)

In occupational settings, studies have linked exposure to PAHs to certain cancers (lung, skin).

Some PAHs may be related to asthma and chronic obstructive pulmonary disease (COPD).

**SOURCES OF PAHs**

Oil Spills

Smoke

Exhaust

Food

### REDUCING EXPOSURE TO AIR POLLUTION

**INDOOR TIPS**

**FILTER**  
Change the filters on your AC and furnace regularly.

**MAINTAIN**  
If you use a wood stove, make sure the openings and chimney do not leak smoke indoors.

**RUN AC**  
In the event of poor air quality days, consider closing windows and running AC.

**VENTILATE**  
When cooking or using a gas or wood-bred stove, run fans or open windows. Grill or smoke outdoors.

**OUTDOOR TIPS**

**CONSULT**  
Use a weather app or go to [nhw.gov](http://nhw.gov) to find the current air quality.

**AVOID**  
Avoid e-cigarettes and cigarette/cigar smoke.

**LIMIT**  
Try to limit exposure to gasoline and diesel fumes (vehicles, machinery).

**CALL**  
Follow burning regulations. Call 541-766-6971 to check current burn bans.

**TIPS TO AVOID WILDFIRE SMOKE**

**REDUCE**  
Avoid common activities that contribute to poor air quality (grilling, burning, yardwork, smoking).

**PROTECT**  
Wear an approved mask to limit the amount of air pollution you inhale.

**APPROPRIATE MASKS**  
N95, N100 or P100

Masks should fit well above the nose and beneath the mouth.  
Change the mask when it gets dirty on the inside, becomes damaged, or becomes difficult to breath through.

OREGON STATE UNIVERSITY, COLLEGE OF PUBLIC HEALTH AND HUMAN SCIENCES

**Figure S2.** Examples of report back materials.

1) study and result summary, 2) what are polycyclic aromatic hydrocarbons (PAHs) and common sources and 3) ways to reduce exposure to PAHs. The Food Safety and Environmental Stewardship logo was created by and is the property of Dr. Kim Anderson.

**Table S1.** Performance reference compound mass per strip (n=3).

| Analyte                  | Mean mass per LDPE strip (ng) | Relative standard deviation |
|--------------------------|-------------------------------|-----------------------------|
| fluorene-d10             | 30100                         | 11%                         |
| pyrene-d10               | 1910                          | 12%                         |
| benzo[b]fluoranthene-d12 | 1790                          | 26%                         |

**Table S2.** Mean concentration in ng/mL for quality control samples accounting for potential background from the laboratory and/or the field. If necessary, QC blank samples were used for sample concentration correction via background subtraction.

| Analyte                         | Laboratory Blank QC Samples (n=12) | Field Trip Blank Samples (n=3) |
|---------------------------------|------------------------------------|--------------------------------|
| naphthalene                     | 19.1                               | 8.74                           |
| 2-methylnaphthalene             | 8.44                               | 7.24                           |
| 1-methylnaphthalene             | 6.30                               | 4.57                           |
| 2-ethylnaphthalene              | 4.52                               | 4.08                           |
| 2,6-dimethylnaphthalene         | 4.21                               | N/A                            |
| 1,6 and 1,3-dimethylnaphthalene | 6.99                               | 7.24                           |
| 1,4-dimethylnaphthalene         | 2.00                               | N/A                            |
| fluorene                        | 75.1                               | 2.95                           |
| dibenzothiophene                | 0.394                              | 0.518                          |
| phenanthrene                    | 96.3                               | 7.00                           |
| 2-methylphenanthrene            | N/A                                | 3.16                           |
| fluoranthene                    | 194                                | N/A                            |
| retene                          | N/A                                | 0.865                          |

Table S3. Unsubstituted PAH physicochemical properties.

| Analyte                                           | CAS                    | MW (g mol <sup>-1</sup> ) | log K <sub>ow</sub> <sup>a</sup> | log K <sub>oa</sub> <sup>b</sup> | H <sub>298</sub> (atm m <sup>3</sup> mol <sup>-1</sup> ) <sup>c</sup> |
|---------------------------------------------------|------------------------|---------------------------|----------------------------------|----------------------------------|-----------------------------------------------------------------------|
| fluorene-d10 (PRC)                                | 81103-79-9             | 176.2                     | 4.18                             | 6.59                             | 6.83x10 <sup>-3</sup>                                                 |
| pyrene-d10 (PRC)                                  | 1718-52-1              | 212.1                     | 4.88                             | 8.19                             | 3.39x10 <sup>-4</sup>                                                 |
| benzo[b]fluoranthene-d12 (PRC)                    | 205-99-2               | 264.2                     | 5.78                             | 10.4                             | 3.31x10 <sup>-5</sup>                                                 |
| naphthalene                                       | 91-20-3                | 128.2                     | 3.30                             | 5.05                             | 5.26x10 <sup>-4</sup>                                                 |
| 2-methylnaphthalene                               | 91-57-6                | 142.2                     | 3.86                             | 5.53                             | 5.80x10 <sup>-4</sup>                                                 |
| 1-methylnaphthalene                               | 90-12-0                | 142.2                     | 3.87                             | 5.55                             | 5.80x10 <sup>-4</sup>                                                 |
| 2-ethylnaphthalene                                | 939-27-5               | 156.1                     | 4.38                             | 6.04                             | 7.71x10 <sup>-4</sup>                                                 |
| 2,6-dimethylnaphthalene                           | 581-42-0               | 156.2                     | 4.31                             | 5.89                             | 6.41x10 <sup>-4</sup>                                                 |
| 1,6-dimethylnaphthalene & 1,3-dimethylnaphthalene | 575-43-9 &<br>575-41-7 | 156.2                     | 4.44                             | 6.02                             | 2.29x10 <sup>-4</sup>                                                 |
| 1,4-dimethylnaphthalene                           | 571-58-4               | 156.2                     | 4.37                             | 6.17                             | 6.41x10 <sup>-4</sup>                                                 |
| 1,5-dimethylnaphthalene                           | 571-61-9               | 156.2                     | 4.38                             | 6.22                             | 6.41x10 <sup>-4</sup>                                                 |
| 1,2-dimethylnaphthalene                           | 573-98-8               | 156.2                     | 4.31                             | 5.89                             | 6.41x10 <sup>-4</sup>                                                 |
| 1,8-dimethylnaphthalene                           | 569-41-5               | 156.2                     | 4.26                             | 6.22                             | 6.41x10 <sup>-4</sup>                                                 |
| 2,6-diethylnaphthalene                            | 59919-41-4             | 184.3                     | 5.25                             | 6.59                             | 1.13x10 <sup>-3</sup>                                                 |
| acenaphthylene                                    | 208-96-8               | 152.2                     | 3.94                             | 6.27                             | 5.48x10 <sup>-5</sup>                                                 |
| acenaphthene                                      | 83-32-9                | 154.2                     | 3.92                             | 6.04                             | 2.82x10 <sup>-4</sup>                                                 |
| fluorene                                          | 86-73-7                | 166.2                     | 4.18                             | 6.59                             | 1.67x10 <sup>-4</sup>                                                 |
| dibenzothiophene                                  | 132-65-0               | 184.3                     | 4.38                             | 7.24                             | 2.79x10 <sup>-5</sup>                                                 |
| phenanthrene                                      | 85-01-8                | 178.2                     | 4.46                             | 7.22                             | 5.13x10 <sup>-5</sup>                                                 |
| anthracene                                        | 120-12-7               | 178.2                     | 4.45                             | 7.09                             | 5.13x10 <sup>-5</sup>                                                 |
| 2-methylphenanthrene                              | 2531-84-2              | 192.3                     | 4.86                             | 7.50                             | 5.67x10 <sup>-5</sup>                                                 |
| 2-methylanthracene                                | 613-12-7               | 192.3                     | 5.00                             | 7.64                             | 5.67x10 <sup>-5</sup>                                                 |
| 1-methylphenanthrene                              | 832-69-9               | 192.3                     | 5.08                             | 7.78                             | 5.67x10 <sup>-5</sup>                                                 |
| 9-methylanthracene                                | 779-02-2               | 192.3                     | 5.07                             | 7.87                             | 5.67x10 <sup>-5</sup>                                                 |
| 3,6-dimethylphenanthrene                          | 1576-67-6              | 206.3                     | <b>5.44</b>                      | 8.03                             | 6.25x10 <sup>-5</sup>                                                 |
| 2,3-dimethylanthracene                            | 613-06-9               | 206.3                     | <b>5.44</b>                      | 8.03                             | 6.25x10 <sup>-5</sup>                                                 |
| fluoranthene                                      | 206-44-0               | 202.3                     | 5.16                             | 8.60                             | 8.30 x10 <sup>-6</sup>                                                |
| 9,10-dimethylanthracene                           | 781-43-1               | 206.3                     | 5.69                             | 8.28                             | 6.25x10 <sup>-5</sup>                                                 |
| pyrene                                            | 129-00-0               | 202.3                     | 4.88                             | 8.19                             | 8.30x10 <sup>-6</sup>                                                 |
| retene                                            | 483-65-8               | 234.3                     | <b>6.35</b>                      | 8.67                             | 1.10x10 <sup>-4</sup>                                                 |
| benzo[a]fluorene                                  | 238-84-6               | 216.2                     | 5.40                             | 8.36                             | 1.63x10 <sup>-5</sup>                                                 |
| benzo[b]fluorene                                  | 243-17-4               | 216.2                     | 5.77                             | 9.57                             | 1.63x10 <sup>-5</sup>                                                 |
| benzo[c]fluorene                                  | 205-12-9               | 216.2                     | <b>5.19</b>                      | 8.37                             | 1.63x10 <sup>-5</sup>                                                 |
| 1-methylpyrene                                    | 2381-21-7              | 216.3                     | <b>5.48</b>                      | 8.91                             | 9.16x10 <sup>-6</sup>                                                 |
| benz[a]anthracene                                 | 56-55-3                | 228.3                     | 5.76                             | 9.07                             | 5.01x10 <sup>-6</sup>                                                 |
| cyclopenta[cd]pyrene                              | 27208-37-3             | 226.3                     | <b>5.70</b>                      | 10.15                            | 8.65x10 <sup>-7</sup>                                                 |
| triphenylene                                      | 217-59-4               | 228.3                     | 5.49                             | 10.69                            | 5.01x10 <sup>-6</sup>                                                 |
| chrysene                                          | 218-01-9               | 228.3                     | 5.81                             | 9.48                             | 5.01x10 <sup>-6</sup>                                                 |
| 6-methylchrysene                                  | 1705-85-7              | 242.3                     | <b>6.07</b>                      | 9.72                             | 5.53x10 <sup>-6</sup>                                                 |
| 5-methylchrysene                                  | 3697-24-3              | 242.3                     | <b>6.07</b>                      | 9.72                             | 5.53x10 <sup>-6</sup>                                                 |
| benzo[b]fluoranthene                              | 205-99-2               | 252.3                     | 5.78                             | 10.35                            | 8.10x10 <sup>-7</sup>                                                 |
| 7,12-dimethylbenz[a]anthracene                    | 57-97-6                | 256.3                     | 5.80                             | 9.61                             | 6.10x10 <sup>-6</sup>                                                 |
| benzo[k]fluoranthene                              | 207-08-9               | 252.3                     | 6.11                             | 10.73                            | 8.10x10 <sup>-7</sup>                                                 |
| benzo[j]fluoranthene                              | 205-82-3               | 252.3                     | <b>6.11</b>                      | 10.59                            | 8.10x10 <sup>-7</sup>                                                 |
| benz[j]aceanthrylene & benz[e]aceanthrylene       | 202-33-5 &<br>199-54-2 | 252.3                     | <b>6.29</b>                      | 10.96                            | 5.23x10 <sup>-7</sup>                                                 |

|                                                         |                     |       |             |       |                       |
|---------------------------------------------------------|---------------------|-------|-------------|-------|-----------------------|
| benzo[e]pyrene                                          | 192-97-2            | 252.3 | 6.44        | 11.35 | 8.10x10 <sup>-7</sup> |
| benzo[a]pyrene                                          | 50-32-8             | 252.3 | 6.13        | 10.86 | 8.10x10 <sup>-7</sup> |
| perylene                                                | 198-55-0            | 252.3 | 6.25        | 10.08 | 8.10x10 <sup>-7</sup> |
| indeno[1,2,3-cd]pyrene                                  | 193-39-5            | 276.3 | <b>6.70</b> | 11.55 | 1.31x10 <sup>-7</sup> |
| dibenzo[a,h]anthracene                                  | 53-70-3             | 278.4 | 6.75        | 11.78 | 4.89x10 <sup>-7</sup> |
| benzo[a]chrysene                                        | 213-46-7            | 278.4 | 7.11        | 11.81 | 4.89x10 <sup>-7</sup> |
| benzo[ghi]perylene                                      | 191-24-2            | 276.3 | 6.63        | 11.50 | 1.31x10 <sup>-7</sup> |
| anthanthrene                                            | 191-26-4            | 276.3 | 7.04        | 12.31 | 1.31x10 <sup>-7</sup> |
| naphtho[1,2-b]fluoranthene                              | 111189-32-3         | 302.4 | <b>7.28</b> | 12.77 | 7.28x10 <sup>-8</sup> |
| naphtho[2,3-j]fluoranthene & naphtho[1,2-k]fluoranthene | 205-83-4 & 238-04-0 | 302.4 | <b>7.28</b> | 12.77 | 7.91x10 <sup>-8</sup> |
| naphtho[2,3-b]fluoranthene                              | 206-06-4            | 302.4 | <b>7.28</b> | 12.77 | 7.91x10 <sup>-8</sup> |
| dibenzo[a,e]fluoranthene                                | 5385-75-1           | 302.3 | <b>7.28</b> | 12.77 | 7.91x10 <sup>-8</sup> |
| dibenzo[a,l]pyrene                                      | 191-30-0            | 302.3 | 7.71        | 13.20 | 7.91x10 <sup>-8</sup> |
| naphtho[2,3-k]fluoranthene                              | 207-18-1            | 302.4 | <b>7.28</b> | 12.77 | 7.91x10 <sup>-8</sup> |
| naphtho[2,3-e]pyrene                                    | 193-09-9            | 302.4 | <b>7.28</b> | 12.77 | 7.91x10 <sup>-8</sup> |
| dibenzo[a,e]pyrene                                      | 192-65-4            | 302.4 | 7.71        | 13.20 | 7.91x10 <sup>-8</sup> |
| coronene                                                | 191-07-1            | 300.4 | 7.64        | 13.70 | 2.12x10 <sup>-8</sup> |
| dibenzo[e,l]pyrene                                      | 192-51-8            | 302.4 | <b>7.28</b> | 12.77 | 7.91x10 <sup>-8</sup> |
| naphtho[2,3-a]pyrene                                    | 196-42-9            | 302.4 | <b>7.28</b> | 12.77 | 7.91x10 <sup>-8</sup> |
| benzo[b]perylene                                        | 197-70-6            | 302.4 | <b>7.28</b> | 12.77 | 7.91x10 <sup>-8</sup> |
| dibenzo[a,i]pyrene                                      | 189-55-9            | 302.4 | <b>7.28</b> | 12.77 | 7.91x10 <sup>-8</sup> |
| dibenzo[a,h]pyrene                                      | 189-64-0            | 302.4 | <b>7.28</b> | 12.77 | 7.91x10 <sup>-8</sup> |

<sup>a</sup> Experimental values reported in <sup>1</sup>

<sup>b</sup> All values are KOAWIN v1.10 <sup>1</sup>

<sup>c</sup> Henry's law constant at 298: estimated via the bond method for the unsubstituted PAH <sup>1</sup>

**Table S4.** Instrument parameters.

| 65 PAH Method                                                                                                                                                                                               |               |                                   |                      |
|-------------------------------------------------------------------------------------------------------------------------------------------------------------------------------------------------------------|---------------|-----------------------------------|----------------------|
| Carrier Gas                                                                                                                                                                                                 |               |                                   |                      |
| Helium (99.99%)                                                                                                                                                                                             |               |                                   |                      |
| Oven Program                                                                                                                                                                                                |               | Inlet Settings                    |                      |
| hold 60°C for 1 min<br>ramp 40°C/min to 180°C<br>ramp 3°C/min to 230°C<br>ramp 15°C/min to 280°C, hold for 10min<br>ramp 6°C/min to 298°C<br>ramp 16°C/min to 350°C, hold 4min<br>Total run time: 47.25 min |               | <b>Mode</b>                       | Pulsed Splitless     |
|                                                                                                                                                                                                             |               | <b>Injection Temperature (°C)</b> | 320                  |
|                                                                                                                                                                                                             |               | <b>Pulse Pressure</b>             | 35 psi Until 0.3 min |
|                                                                                                                                                                                                             |               | <b>Purge Flow</b>                 | 25 mL/min at 0.7 min |
| Column Settings & Specifications                                                                                                                                                                            |               | MSD Settings                      |                      |
| J&W Select PAH, Part # CP7462, L 30 m, ID 0.25 mm, Film 0.15 µm                                                                                                                                             |               | <b>MSD Transfer Line Temp</b>     | 320°C                |
|                                                                                                                                                                                                             |               | <b>Source Temp</b>                | 340°C                |
| <b>Mode</b>                                                                                                                                                                                                 | Constant Flow | <b>Collision Gas (purity)</b>     | Nitrogen (99.99%)    |
| <b>Flow Rate</b>                                                                                                                                                                                            | 2 mL/min      | <b>Flow Rate</b>                  | 1.5 mL/min           |

## PAH environmental calculations

Time-weighted average concentrations for the air vapor phase are determined using an empirical uptake model as described by Huckins et al.<sup>1</sup> The air vapor phase  $C_a$  (ng/m<sup>3</sup>) is calculated using the following equation:

$$C_a = \frac{N_{analyte}}{V_s K_{sa(T)} (1 - e^{(-\frac{R_s E}{V_s K_{sa}})})} \quad \text{Eq. S1}$$

where  $N_{analyte}$  (ng) is the mass of the target compound in the sampler,  $V_s$  (cm<sup>3</sup>) is the volume of the sampler,  $K_{sa(T)}$  is the sampler-air partitioning coefficient,  $R_s$  is the PRC-derived sampling rate (m<sup>3</sup>/day), and  $E$  is the exposure duration (days).

$K_{sa(298)}$  is derived by first calculating the sampler-water partition coefficient, which is estimated using an empirical relationship as described by Huckins et al.<sup>1</sup>:

$$\log K_{sw} = -2.61 + 2.321 * \log K_{ow} - 0.1618 * (\log K_{ow})^2 \quad \text{Eq. S2}$$

$K_{sa(298)}$  is then calculated using  $K_{sw}$  and the unitless Henry's law constant ( $H'_{298}$ ) at 298 K as described by Lohmann<sup>2</sup>:

$$K_{sa(298)} = \frac{K_{sw}}{H'_{298}} \quad \text{Eq. S3}$$

The sampler-air partitioning coefficient is then temperature corrected as  $K_{sa(T)}$  using the Van't Hoff equation<sup>3-5</sup>:

$$K_{sa(T)} = K_{sa} * \exp\left(\frac{-\Delta H_{vap}}{R} \left(\frac{1}{T} - \frac{1}{298}\right)\right) \quad \text{Eq. S4}$$

where  $R$  (8.31 x 10<sup>-3</sup> kJ/mol-K) is the ideal gas constant,  $T$  (K) is the average temperature across the deployment period, and  $\Delta H_{vap}$  is the enthalpy of vaporization (kJ/mol).

Sampling rates for target analytes in air ( $R_{sa}$ ) are calculated using the PRC sampling rate ( $R_{sa,PRC}$ ) in air. PRC sampling rate is calculated using the following equation<sup>1</sup>:

$$R_{sa,PRC} = -\frac{\ln\left(\frac{N}{N_0}\right)}{E} K_{sa(T)} V_s \quad \text{Eq. S5}$$

where  $N$  (ng) is the mass of PRC remaining in the passive sampler after field deployment and  $N_0$  (ng) is the mass of PRC in the passive sampler prior to field deployment.

Sampling rates for target analytes are related to PRC sampling rates through the following equation:

$$R_{sa,analyte} = R_{sa,PRC} * \frac{\beta_{analyte}}{\beta_{PRC}} \quad \text{Eq. S6}$$

where  $\beta$  represents a compound specific function of  $K_{oa}$ :

$$\log \beta = 0.154 * \log K_{oa} - 0.80 \quad \text{Eq. S7}$$

## Calculations for cancer and non-cancer risk assessment

Risk estimates were calculated as defined by the United States Environmental Protection Agency's (U.S. EPA) Human Health Evaluation Manual for Inhalation Risk Assessment<sup>6</sup> for residential exposure scenarios. For each sample, the exposure concentration was calculated for an individual PAH. The risk for each PAH was then summed to yield an estimate of total cancer risk and total hazard quotient for the PAHs in a sample. This method assumes independence of action across all compounds. For indoor air samples, exposure time was set to 21 hours/day based on results from the U.S. EPA National Human Activity Pattern Survey<sup>7</sup>. Outdoor samples had an exposure time of 3 hours/day. Exposure duration was set to 18 years to reflect the average residential exposure scenario<sup>6</sup>. For comparisons before, during and after wildfires, the exposure frequency was set to 23 days. This exposure frequency represents the average number of sampling days across the entire study. For comparisons between indoor and outdoor air during wildfires, the exposure frequency was set to the number of days of smoke impact during sampling for each location. In all exposure scenarios the average lifetime was set at 70 years. All risk estimates assume exposed individuals are adults. Available IUR and RfC values were compiled for PAHs in our analytical method from federal and state databases<sup>8-12</sup>. Sources of toxicological information were prioritized based on the U.S. EPA's Office of Solid Waste and Emergency Response policy recommendations<sup>13</sup>.

Exposure concentration is calculated using the following equation:

$$EC = \frac{CA * ET * EF * ED}{AT} \quad \text{Eq. S8}$$

where CA ( $\mu\text{g}/\text{m}^3$ ) is the PAH concentration in air, ET (hours/day) is the exposure time, EF (days/year) is equal to the exposure frequency, ED (years) is the exposure duration and AT (lifetime in years \* 365 days/year \* 24 hours/day) is the averaging time.

The excess inhalation cancer risk is estimated with the following equation:

$$\text{Risk} = \text{IUR} * \text{EC} \quad \text{Eq. S9}$$

where IUR ( $\mu\text{g}/\text{m}^3$ )<sup>-1</sup> is the inhalation unit risk and EC ( $\mu\text{g}/\text{m}^3$ ) is the exposure concentration.

The inhalation hazard quotient is estimated with the following equation:

$$\text{Hazard Quotient} = \frac{\text{EC}}{\text{RfC}} \quad \text{Eq. S10}$$

Where RfC ( $\text{mg}/\text{m}^3$ ) is the inhalation reference concentration.

**Table S5.** Inhalation unit risk (IUR) and reference concentration (RfC) values for risk assessment. Values were chosen based on EPA criteria (OSWER Directive 9285.7-53).

| PAH                            | IUR ( $\mu\text{g}/\text{m}^3$ ) <sup>-1</sup> | RfC ( $\text{mg}/\text{m}^3$ ) |
|--------------------------------|------------------------------------------------|--------------------------------|
| naphthalene                    | 3.40E-05 <sup>1</sup>                          | 0.003 <sup>1</sup>             |
| 1-methylnaphthalene            | N/A                                            | 0.014 <sup>4</sup>             |
| 2-methylnaphthalene            | N/A                                            | 0.0033 <sup>4</sup>            |
| fluoranthene                   | 2.10E-02 <sup>2</sup>                          | N/A                            |
| benzo[c]fluorene               | 8.30E-05 <sup>2</sup>                          | N/A                            |
| benz[a]anthracene              | 1.10E-04 <sup>3</sup>                          | N/A                            |
| cyclopenta[cd]pyrene           | 4.20E-03 <sup>2</sup>                          | N/A                            |
| chrysene                       | 6.00E-07 <sup>3</sup>                          | N/A                            |
| 5-methylchrysene               | 1.10E+00 <sup>3</sup>                          | N/A                            |
| benzo[b]fluoranthene           | 1.10E-04 <sup>3</sup>                          | N/A                            |
| 7,12-dimethylbenz[a]anthracene | 7.10E+00 <sup>5</sup>                          | N/A                            |
| benzo[k]fluoranthene           | 6.00E-06 <sup>3</sup>                          | N/A                            |
| benzo[j]fluoranthene           | 1.10E+00 <sup>3</sup>                          | N/A                            |
| benzo[a]pyrene                 | 1.10E-03 <sup>1</sup>                          | 2.00E-06 <sup>1</sup>          |
| indeno[1,2,3-cd]pyrene         | 1.10E-04 <sup>3</sup>                          | N/A                            |
| dibenzo[a,h]anthracene         | 1.20E-03 <sup>3</sup>                          | N/A                            |
| benzo[ghi]perylene             | 1.90E-01 <sup>2</sup>                          | N/A                            |
| anthanthrene                   | 4.20E-03 <sup>2</sup>                          | N/A                            |
| dibenzo[a,e]pyrene             | 1.10E-03 <sup>3</sup>                          | N/A                            |
| dibenzo[a,h]pyrene             | 1.10E-02 <sup>3</sup>                          | N/A                            |
| dibenzo[a,i]pyrene             | 1.10E-02 <sup>3</sup>                          | N/A                            |
| dibenzo[a,l]pyrene             | 1.10E-02 <sup>3</sup>                          | N/A                            |

<sup>1</sup>EPA Integrated Risk Information System (IRIS)

<sup>2</sup>Oregon Department of Environmental Quality (OAR 340-245-8030)

<sup>3</sup>California EPA Air Toxics

<sup>4</sup>EPA CompTox Dashboard

<sup>5</sup>EPA Integrated Risk Information System (IRIS)

**Air quality index (AQI) and National Oceanic and Atmospheric Administration (NOAA) smoke density**

AQI and smoke density values were collected for each day and averaged over the sampling period. The NOAA hazard mapping system bins smoke density into three categories light (5 µg/m<sup>3</sup>), medium (16 µg/m<sup>3</sup>) and heavy (27 µg/m<sup>3</sup>). N/A = not available N/S = not sampling.

**Table S6.** U.S. EPA AQI values before wildfires.

| Day                      | St Helena, CA<br>(n=25) | Richland, WA<br>(n=22) | Seattle, WA 1<br>(n=22) | Alturas, CA<br>(n=52) | Cobb, CA<br>(n=22) | Sandpoint, ID<br>(n=44) | Lake Oswego, OR<br>(n=21) | Newport, OR<br>(n=21) | Corvallis, OR 1<br>(n=36) |
|--------------------------|-------------------------|------------------------|-------------------------|-----------------------|--------------------|-------------------------|---------------------------|-----------------------|---------------------------|
| Monitor Distance (miles) | 20                      | 10                     | 5                       | 54                    | 42                 | 5                       | 9                         | 50                    | 5                         |
| Day 1                    | 30                      | 16                     | 52                      | 19                    | 33                 | 19                      | 27                        | 18                    | 23                        |
| Day 2                    | 34                      | 13                     | 43                      | 17                    | 27                 | 21                      | 33                        | 16                    | 18                        |
| Day 3                    | 50                      | 12                     | 32                      | 7                     | 17                 | 29                      | 24                        | 16                    | 12                        |
| Day 4                    | 52                      | 9                      | 21                      | 8                     | 13                 | 25                      | 34                        | 16                    | 10                        |
| Day 5                    | 24                      | 10                     | 24                      | 10                    | 16                 | 36                      | 28                        | 11                    | 14                        |
| Day 6                    | 10                      | 13                     | 29                      | 13                    | 14                 | 26                      | 28                        | 11                    | 13                        |
| Day 7                    | 7                       | 13                     | 36                      | 13                    | 18                 | 27                      | 15                        | 12                    | 19                        |
| Day 8                    | 12                      | 16                     | 30                      | 16                    | 16                 | N/A                     | 18                        | 15                    | 18                        |
| Day 9                    | 20                      | 15                     | 30                      | 18                    | 20                 | 10                      | 27                        | 15                    | 16                        |
| Day 10                   | 10                      | 13                     | 31                      | 14                    | 23                 | 13                      | 28                        | 21                    | 16                        |
| Day 11                   | 18                      | 13                     | 31                      | 20                    | 20                 | 17                      | 25                        | 16                    | 16                        |
| Day 12                   | 13                      | 21                     | 3                       | 11                    | 19                 | 16                      | 19                        | 18                    | 11                        |
| Day 13                   | 6                       | 14                     | 25                      | 23                    | 29                 | 12                      | 19                        | 17                    | 11                        |
| Day 14                   | 12                      | 13                     | 28                      | 15                    | 39                 | 15                      | 18                        | 27                    | 12                        |
| Day 15                   | 15                      | 9                      | 39                      | 18                    | 15                 | 9                       | 19                        | 20                    | 15                        |
| Day 16                   | 11                      | 10                     | 37                      | 14                    | N/A                | 15                      | 18                        | 15                    | 15                        |
| Day 17                   | 26                      | 9                      | 41                      | 17                    | 21                 | 18                      | 17                        | 16                    | 21                        |
| Day 18                   | 36                      | 15                     | 35                      | 17                    | 17                 | 15                      | 29                        | 12                    | 16                        |
| Day 19                   | 24                      | 21                     | 56                      | 33                    | 11                 | 20                      | 26                        | 10                    | 18                        |
| Day 20                   | 18                      | 18                     | 31                      | 24                    | 16                 | 21                      | 35                        | 18                    | 17                        |
| Day 21                   | 29                      | 10                     | 81                      | 15                    | N/S                | 21                      | 39                        | 27                    | 27                        |
| Day 22                   | 20                      | 11                     | 26                      | 44                    | N/S                | 16                      | N/S                       | N/S                   | 20                        |
| Day 23                   | 22                      | N/S                    | N/S                     | 27                    | N/S                | 15                      | N/S                       | N/S                   | 15                        |
| Day 24                   | 16                      | N/S                    | N/S                     | 40                    | N/S                | 22                      | N/S                       | N/S                   | 16                        |
| Day 25                   | 20                      | N/S                    | N/S                     | 20                    | N/S                | 21                      | N/S                       | N/S                   | 12                        |
| Day 26                   | N/S                     | N/S                    | N/S                     | 16                    | N/S                | 20                      | N/S                       | N/S                   | 10                        |
| Day 27                   | N/S                     | N/S                    | N/S                     | 14                    | N/S                | 12                      | N/S                       | N/S                   | 18                        |
| Day 28                   | N/S                     | N/S                    | N/S                     | 40                    | N/S                | 13                      | N/S                       | N/S                   | 27                        |
| Day 29                   | N/S                     | N/S                    | N/S                     | 54                    | N/S                | 23                      | N/S                       | N/S                   | 19                        |
| Day 30                   | N/S                     | N/S                    | N/S                     | 44                    | N/S                | 25                      | N/S                       | N/S                   | 19                        |
| Day 31                   | N/S                     | N/S                    | N/S                     | 58                    | N/S                | 34                      | N/S                       | N/S                   | 30                        |
| Day 32                   | N/S                     | N/S                    | N/S                     | 51                    | N/S                | 44                      | N/S                       | N/S                   | 30                        |
| Day 33                   | N/S                     | N/S                    | N/S                     | 49                    | N/S                | 38                      | N/S                       | N/S                   | 27                        |
| Day 34                   | N/S                     | N/S                    | N/S                     | 10                    | N/S                | 27                      | N/S                       | N/S                   | 12                        |
| Day 35                   | N/S                     | N/S                    | N/S                     | 13                    | N/S                | 29                      | N/S                       | N/S                   | 17                        |
| Day 36                   | N/S                     | N/S                    | N/S                     | 13                    | N/S                | 38                      | N/S                       | N/S                   | 18                        |
| Day 37                   | N/S                     | N/S                    | N/S                     | 15                    | N/S                | 15                      | N/S                       | N/S                   | N/S                       |
| Day 38                   | N/S                     | N/S                    | N/S                     | 25                    | N/S                | 29                      | N/S                       | N/S                   | N/S                       |
| Day 39                   | N/S                     | N/S                    | N/S                     | 28                    | N/S                | 55                      | N/S                       | N/S                   | N/S                       |
| Day 40                   | N/S                     | N/S                    | N/S                     | 34                    | N/S                | 59                      | N/S                       | N/S                   | N/S                       |
| Day 41                   | N/S                     | N/S                    | N/S                     | 38                    | N/S                | 63                      | N/S                       | N/S                   | N/S                       |
| Day 42                   | N/S                     | N/S                    | N/S                     | 43                    | N/S                | 59                      | N/S                       | N/S                   | N/S                       |
| Day 43                   | N/S                     | N/S                    | N/S                     | 13                    | N/S                | 48                      | N/S                       | N/S                   | N/S                       |
| Day 44                   | N/S                     | N/S                    | N/S                     | 17                    | N/S                | 51                      | N/S                       | N/S                   | N/S                       |
| Day 45                   | N/S                     | N/S                    | N/S                     | 42                    | N/S                | N/S                     | N/S                       | N/S                   | N/S                       |
| Day 46                   | N/S                     | N/S                    | N/S                     | 15                    | N/S                | N/S                     | N/S                       | N/S                   | N/S                       |
| Day 47                   | N/S                     | N/S                    | N/S                     | 48                    | N/S                | N/S                     | N/S                       | N/S                   | N/S                       |
| Day 48                   | N/S                     | N/S                    | N/S                     | 59                    | N/S                | N/S                     | N/S                       | N/S                   | N/S                       |



|                |           |           |           |           |           |           |           |           |           |           |
|----------------|-----------|-----------|-----------|-----------|-----------|-----------|-----------|-----------|-----------|-----------|
| Day 49         | N/S       | N/S       | N/S       | 28        | N/S       | N/S       | N/S       | N/S       | N/S       | N/S       |
| Day 50         | N/S       | N/S       | N/S       | 57        | N/S       | N/S       | N/S       | N/S       | N/S       | N/S       |
| Day 51         | N/S       | N/S       | N/S       | 60        | N/S       | N/S       | N/S       | N/S       | N/S       | N/S       |
| Day 52         | N/S       | N/S       | N/S       | 43        | N/S       | N/S       | N/S       | N/S       | N/S       | N/S       |
| <b>Average</b> | <b>21</b> | <b>13</b> | <b>35</b> | <b>27</b> | <b>20</b> | <b>27</b> | <b>25</b> | <b>17</b> | <b>17</b> | <b>17</b> |
| <b>Std Dev</b> | <b>12</b> | <b>3</b>  | <b>15</b> | <b>16</b> | <b>7</b>  | <b>14</b> | <b>7</b>  | <b>5</b>  | <b>5</b>  | <b>5</b>  |

**Table S7.** U.S. EPA AQI values during wildfires. N/A = not available N/S = not sampling.

| Day                            | Carson, WA<br>(n=21) | St Helena, CA<br>(n=26) | Prineville, OR<br>(n=40) | Alturas, CA<br>(n=30) | Richland, WA<br>(n=23) | Sunriver, OR<br>(n=18) | Corvallis, OR<br>2 (n=14) | Seattle, WA 2<br>(n=14) | Lake<br>Oswego, OR<br>(n=16) | McCall, ID<br>(n=23) | Newport, OR<br>(n=10) | Sandpoint, ID<br>(n=15) |
|--------------------------------|----------------------|-------------------------|--------------------------|-----------------------|------------------------|------------------------|---------------------------|-------------------------|------------------------------|----------------------|-----------------------|-------------------------|
| Monitor<br>Distance<br>(miles) | 20                   | 20                      | 5                        | 54                    | 10                     | 17                     | 5                         | 5                       | 9                            | 5                    | 50                    | 5                       |
| Day 1                          | 28                   | 56                      | 60                       | 113                   | 52                     | 72                     | 199                       | 149                     | 18                           | 71                   | 167                   | 197                     |
| Day 2                          | 20                   | 10                      | 70                       | 79                    | 51                     | 57                     | 515                       | 99                      | 67                           | 77                   | 171                   | 282                     |
| Day 3                          | 24                   | 60                      | 81                       | 60                    | 43                     | 60                     | 350                       | 109                     | 210                          | 115                  | 156                   | 250                     |
| Day 4                          | 24                   | 119                     | 56                       | 73                    | 43                     | 260                    | 260                       | 202                     | 287                          | 192                  | 53                    | 249                     |
| Day 5                          | 34                   | 140                     | 64                       | 64                    | 39                     | 609                    | 342                       | 198                     | 388                          | 160                  | 70                    | 179                     |
| Day 6                          | 24                   | 128                     | 30                       | 52                    | 77                     | 507                    | 325                       | 207                     | 485                          | 136                  | 17                    | 154                     |
| Day 7                          | 20                   | 87                      | 72                       | 13                    | 58                     | 264                    | 267                       | 220                     | 387                          | 155                  | 23                    | 156                     |
| Day 8                          | 13                   | 61                      | 73                       | 61                    | 75                     | 276                    | 191                       | 236                     | 282                          | 154                  | 12                    | 95                      |
| Day 9                          | 13                   | 56                      | 19                       | 89                    | 82                     | 159                    | 217                       | 178                     | 314                          | 64                   | 15                    | 34                      |
| Day 10                         | 24                   | 64                      | 35                       | 138                   | 223                    | 187                    | 275                       | 146                     | 242                          | 78                   | 18                    | 26                      |
| Day 11                         | 20                   | 75                      | 25                       | 122                   | 462                    | 400                    | 57                        | 154                     | 116                          | 39                   | N/S                   | 55                      |
| Day 12                         | 18                   | 121                     | 34                       | 53                    | 376                    | 199                    | 15                        | 19                      | 25                           | 43                   | N/S                   | 18                      |
| Day 13                         | 18                   | 97                      | 41                       | 43                    | 408                    | 39                     | 26                        | 28                      | 39                           | 81                   | N/S                   | 20                      |
| Day 14                         | 18                   | 20                      | 53                       | 22                    | 346                    | 28                     | 36                        | 45                      | 89                           | 72                   | N/S                   | 20                      |
| Day 15                         | 17                   | 17                      | 59                       | 160                   | 185                    | 82                     | N/S                       | N/S                     | 29                           | 37                   | N/S                   | 10                      |
| Day 16                         | 15                   | 59                      | 65                       | 173                   | 177                    | 85                     | N/S                       | N/S                     | 61                           | 37                   | N/S                   | N/S                     |
| Day 17                         | 17                   | 67                      | 39                       | 158                   | 162                    | 12                     | N/S                       | N/S                     | N/S                          | 15                   | N/S                   | N/S                     |
| Day 18                         | 13                   | 104                     | 53                       | 157                   | 40                     | 13                     | N/S                       | N/S                     | N/S                          | 8                    | N/S                   | N/S                     |
| Day 19                         | 13                   | 72                      | 240                      | 152                   | 29                     | N/S                    | N/S                       | N/S                     | N/S                          | 9                    | N/S                   | N/S                     |
| Day 20                         | 11                   | 73                      | 164                      | 158                   | 39                     | N/S                    | N/S                       | N/S                     | N/S                          | 23                   | N/S                   | N/S                     |
| Day 21                         | 47                   | 93                      | 471                      | 166                   | 45                     | N/S                    | N/S                       | N/S                     | N/S                          | 15                   | N/S                   | N/S                     |
| Day 22                         | N/S                  | 152                     | 346                      | 155                   | 53                     | N/S                    | N/S                       | N/S                     | N/S                          | 22                   | N/S                   | N/S                     |
| Day 23                         | N/S                  | 160                     | 184                      | 66                    | 46                     | N/S                    | N/S                       | N/S                     | N/S                          | 80                   | N/S                   | N/S                     |
| Day 24                         | N/S                  | 170                     | 300                      | 63                    | N/S                    | N/S                    | N/S                       | N/S                     | N/S                          | N/S                  | N/S                   | N/S                     |
| Day 25                         | N/S                  | 168                     | 251                      | 54                    | N/S                    | N/S                    | N/S                       | N/S                     | N/S                          | N/S                  | N/S                   | N/S                     |
| Day 26                         | N/S                  | 178                     | 292                      | 97                    | N/S                    | N/S                    | N/S                       | N/S                     | N/S                          | N/S                  | N/S                   | N/S                     |
| Day 27                         | N/S                  | N/S                     | 221                      | 76                    | N/S                    | N/S                    | N/S                       | N/S                     | N/S                          | N/S                  | N/S                   | N/S                     |
| Day 28                         | N/S                  | N/S                     | 48                       | 48                    | N/S                    | N/S                    | N/S                       | N/S                     | N/S                          | N/S                  | N/S                   | N/S                     |
| Day 29                         | N/S                  | N/S                     | 56                       | 29                    | N/S                    | N/S                    | N/S                       | N/S                     | N/S                          | N/S                  | N/S                   | N/S                     |
| Day 30                         | N/S                  | N/S                     | 68                       | 9                     | N/S                    | N/S                    | N/S                       | N/S                     | N/S                          | N/S                  | N/S                   | N/S                     |
| Day 31                         | N/S                  | N/S                     | 62                       | N/S                   | N/S                    | N/S                    | N/S                       | N/S                     | N/S                          | N/S                  | N/S                   | N/S                     |
| Day 32                         | N/S                  | N/S                     | 11                       | N/S                   | N/S                    | N/S                    | N/S                       | N/S                     | N/S                          | N/S                  | N/S                   | N/S                     |
| Day 33                         | N/S                  | N/S                     | 13                       | N/S                   | N/S                    | N/S                    | N/S                       | N/S                     | N/S                          | N/S                  | N/S                   | N/S                     |
| Day 34                         | N/S                  | N/S                     | 9                        | N/S                   | N/S                    | N/S                    | N/S                       | N/S                     | N/S                          | N/S                  | N/S                   | N/S                     |
| Day 35                         | N/S                  | N/S                     | 16                       | N/S                   | N/S                    | N/S                    | N/S                       | N/S                     | N/S                          | N/S                  | N/S                   | N/S                     |
| Day 36                         | N/S                  | N/S                     | 15                       | N/S                   | N/S                    | N/S                    | N/S                       | N/S                     | N/S                          | N/S                  | N/S                   | N/S                     |
| Day 37                         | N/S                  | N/S                     | 19                       | N/S                   | N/S                    | N/S                    | N/S                       | N/S                     | N/S                          | N/S                  | N/S                   | N/S                     |
| Day 38                         | N/S                  | N/S                     | 29                       | N/S                   | N/S                    | N/S                    | N/S                       | N/S                     | N/S                          | N/S                  | N/S                   | N/S                     |
| Day 39                         | N/S                  | N/S                     | 29                       | N/S                   | N/S                    | N/S                    | N/S                       | N/S                     | N/S                          | N/S                  | N/S                   | N/S                     |
| Day 40                         | N/S                  | N/S                     | N/S                      | N/S                   | N/S                    | N/S                    | N/S                       | N/S                     | N/S                          | N/S                  | N/S                   | N/S                     |
| <b>Average</b>                 | <b>21</b>            | <b>93</b>               | <b>95</b>                | <b>90</b>             | <b>135</b>             | <b>184</b>             | <b>220</b>                | <b>142</b>              | <b>189</b>                   | <b>73</b>            | <b>70</b>             | <b>116</b>              |
| <b>Std Dev</b>                 | <b>8</b>             | <b>48</b>               | <b>108</b>               | <b>51</b>             | <b>136</b>             | <b>175</b>             | <b>146</b>                | <b>72</b>               | <b>154</b>                   | <b>55</b>            | <b>68</b>             | <b>98</b>               |

**Table S8.** U.S. EPA AQI values after wildfires. N/A = not available N/S = not sampling.

| Day                            | Carson, WA<br>(n=23) | Sunriver, OR<br>(n=22) | Corvallis, OR 2<br>(n=22) | Seattle, WA 2<br>(n=22) | Richland, WA<br>(n=22) | Seattle, WA 1<br>(n=22) | Cobb, CA<br>(n=22) | McCall, ID<br>(n=22) | Sandpoint, ID<br>(n=24) | Lake Oswego,<br>OR (n=22) | Prineville, OR<br>(n=18) | Corvallis, OR 1<br>(n=29) |
|--------------------------------|----------------------|------------------------|---------------------------|-------------------------|------------------------|-------------------------|--------------------|----------------------|-------------------------|---------------------------|--------------------------|---------------------------|
| Monitor<br>Distance<br>(miles) | 20                   | 17                     | 5                         | 0-2                     | 10                     | 5                       | 42                 | 5                    | 5                       | 9                         | 5                        | 5                         |
| Day 1                          | 40                   | 12                     | 16                        | 23                      | 22                     | 24                      | 19                 | 15                   | 22                      | 14                        | 37                       | 13                        |
| Day 2                          | 33                   | 11                     | 23                        | 26                      | 15                     | 26                      | 19                 | 27                   | 33                      | 17                        | 36                       | 17                        |
| Day 3                          | 57                   | 15                     | 23                        | 39                      | 12                     | 24                      | 24                 | 32                   | 13                      | 18                        | 40                       | 23                        |
| Day 4                          | 64                   | 19                     | 23                        | 46                      | 11                     | 21                      | 18                 | 34                   | 9                       | 18                        | 40                       | 29                        |
| Day 5                          | 33                   | 20                     | 23                        | 60                      | 9                      | 25                      | 21                 | 42                   | 13                      | 18                        | 39                       | 31                        |
| Day 6                          | 15                   | 34                     | 18                        | 38                      | 11                     | 24                      | 19                 | 21                   | 12                      | 18                        | 27                       | 24                        |
| Day 7                          | 13                   | 24                     | 16                        | 48                      | 17                     | 25                      | 13                 | 21                   | 19                      | 17                        | 19                       | 20                        |
| Day 8                          | 14                   | 29                     | 9                         | 59                      | 24                     | 22                      | 15                 | 22                   | 25                      | 22                        | 26                       | 15                        |
| Day 9                          | 18                   | 46                     | 20                        | 63                      | 14                     | 26                      | 7                  | 15                   | 13                      | 14                        | 26                       | 15                        |
| Day 10                         | 16                   | 35                     | 23                        | 54                      | 12                     | 32                      | 2                  | 19                   | 5                       | 15                        | 26                       | 14                        |
| Day 11                         | 17                   | 38                     | 17                        | 51                      | 16                     | 32                      | 9                  | 11                   | 7                       | 18                        | 19                       | 16                        |
| Day 12                         | 28                   | 32                     | 23                        | 43                      | 20                     | 29                      | 25                 | 19                   | 9                       | 19                        | 29                       | 15                        |
| Day 13                         | 23                   | 54                     | 38                        | 38                      | 14                     | 23                      | 26                 | 22                   | N/A                     | 24                        | 33                       | 30                        |
| Day 14                         | 25                   | 105                    | 47                        | 61                      | 16                     | 27                      | 20                 | 20                   | N/A                     | 24                        | 24                       | 14                        |
| Day 15                         | 29                   | 99                     | 51                        | 78                      | 10                     | 32                      | 27                 | 17                   | 4                       | 19                        | 31                       | 12                        |
| Day 16                         | 38                   | 78                     | 57                        | 86                      | 16                     | 37                      | N/A                | 27                   | 8                       | 28                        | 37                       | 24                        |
| Day 17                         | N/A                  | 67                     | 30                        | 67                      | 17                     | 42                      | 15                 | 21                   | 3                       | 26                        | 28                       | 19                        |
| Day 18                         | 17                   | 76                     | 51                        | 28                      | 22                     | 45                      | 19                 | 20                   | 10                      | 23                        | 35                       | 26                        |
| Day 19                         | 28                   | 89                     | 71                        | 33                      | 24                     | 41                      | 20                 | 16                   | 15                      | 29                        | N/S                      | 19                        |
| Day 20                         | 23                   | 81                     | 68                        | 48                      | 29                     | 33                      | 6                  | 11                   | 13                      | 29                        | N/S                      | 12                        |
| Day 21                         | 25                   | 52                     | 72                        | 59                      | 21                     | 42                      | N/A                | 13                   | 9                       | 32                        | N/S                      | 19                        |
| Day 22                         | 30                   | 56                     | 69                        | 56                      | 26                     | 44                      | 13                 | 17                   | 11                      | 42                        | N/S                      | 24                        |
| Day 23                         | 38                   | N/S                    | N/S                       | N/S                     | N/S                    | N/S                     | N/S                | N/S                  | 8                       | N/S                       | N/S                      | 38                        |
| Day 24                         | N/S                  | N/S                    | N/S                       | N/S                     | N/S                    | N/S                     | N/S                | N/S                  | 18                      | N/S                       | N/S                      | 38                        |
| Day 25                         | N/S                  | N/S                    | N/S                       | N/S                     | N/S                    | N/S                     | N/S                | N/S                  | N/S                     | N/S                       | N/S                      | 50                        |
| Day 26                         | N/S                  | N/S                    | N/S                       | N/S                     | N/S                    | N/S                     | N/S                | N/S                  | N/S                     | N/S                       | N/S                      | 55                        |
| Day 27                         | N/S                  | N/S                    | N/S                       | N/S                     | N/S                    | N/S                     | N/S                | N/S                  | N/S                     | N/S                       | N/S                      | 60                        |
| Day 28                         | N/S                  | N/S                    | N/S                       | N/S                     | N/S                    | N/S                     | N/S                | N/S                  | N/S                     | N/S                       | N/S                      | 59                        |
| Day 29                         | N/S                  | N/S                    | N/S                       | N/S                     | N/S                    | N/S                     | N/S                | N/S                  | N/S                     | N/S                       | N/S                      | 38                        |
| <b>Average</b>                 | <b>28</b>            | <b>49</b>              | <b>36</b>                 | <b>50</b>               | <b>17</b>              | <b>31</b>               | <b>17</b>          | <b>21</b>            | <b>13</b>               | <b>22</b>                 | <b>31</b>                | <b>27</b>                 |
| <b>Std Dev</b>                 | <b>13</b>            | <b>29</b>              | <b>21</b>                 | <b>16</b>               | <b>6</b>               | <b>8</b>                | <b>7</b>           | <b>8</b>             | <b>7</b>                | <b>7</b>                  | <b>7</b>                 | <b>14</b>                 |



**Table S10.** NOAA hazard mapping smoke impact during wildfires. N/A = not available N/S = not sampling.

| Day                 | Carson, WA<br>(n=21) | St Helena, CA<br>(n=26) | Prineville, OR<br>(n=40) | Alturas, CA<br>(n=30) | Richland, WA<br>(n=23) | Sunriver, OR<br>(n=18) | Corvallis, OR<br>2 (n=14) | Seattle, WA 2<br>(n=14) | Lake Oswego,<br>OR (n=16) | McCall, ID<br>(n=23) | Newport, OR<br>(n=10) | Sandpoint, ID<br>(n=15) |
|---------------------|----------------------|-------------------------|--------------------------|-----------------------|------------------------|------------------------|---------------------------|-------------------------|---------------------------|----------------------|-----------------------|-------------------------|
| Day 1               | None                 | Heavy                   | Heavy                    | Heavy                 | Medium                 | Heavy                  | Heavy                     | Medium                  | Medium                    | Heavy                | Light                 | Heavy                   |
| Day 2               | Medium               | Heavy                   | Heavy                    | Heavy                 | Heavy                  | Light                  | Heavy                     | Light                   | Heavy                     | Heavy                | Light                 | Heavy                   |
| Day 3               | Light                | Heavy                   | Heavy                    | Heavy                 | Medium                 | Medium                 | Heavy                     | Medium                  | Medium                    | Medium               | Heavy                 | Heavy                   |
| Day 4               | Light                | Heavy                   | Heavy                    | Heavy                 | Light                  | Heavy                  | Medium                    | Medium                  | Heavy                     | Heavy                | Heavy                 | Heavy                   |
| Day 5               | Medium               | Heavy                   | Medium                   | Heavy                 | Medium                 | Medium                 | Heavy                     | Heavy                   | Heavy                     | Heavy                | Heavy                 | Heavy                   |
| Day 6               | Heavy                | Heavy                   | Heavy                    | None                  | Medium                 | Heavy                  | Heavy                     | Heavy                   | Medium                    | Medium               | Heavy                 | Medium                  |
| Day 7               | Heavy                | Heavy                   | Heavy                    | None                  | None                   | Heavy                  | Heavy                     | Medium                  | Heavy                     | Heavy                | Heavy                 | Heavy                   |
| Day 8               | Heavy                | Medium                  | Heavy                    | Light                 | Light                  | Heavy                  | Heavy                     | Medium                  | Heavy                     | Heavy                | Heavy                 | Light                   |
| Day 9               | Heavy                | Heavy                   | Heavy                    | Heavy                 | Medium                 | Heavy                  | Heavy                     | Heavy                   | Heavy                     | Heavy                | Heavy                 | None                    |
| Day 10              | Medium               | Heavy                   | None                     | Heavy                 | Medium                 | Heavy                  | Heavy                     | Heavy                   | Heavy                     | Heavy                | Light                 | Light                   |
| Day 11              | Heavy                | Heavy                   | None                     | Heavy                 | Heavy                  | Heavy                  | Heavy                     | Heavy                   | None                      | None                 | Light                 | Light                   |
| Day 12              | Medium               | Heavy                   | Light                    | Medium                | Heavy                  | Heavy                  | None                      | Light                   | Light                     | Light                | Light                 | None                    |
| Day 13              | Light                | Heavy                   | Medium                   | Light                 | Heavy                  | None                   | Light                     | None                    | Light                     | Light                | Medium                | None                    |
| Day 14              | Heavy                | Heavy                   | Heavy                    | Light                 | Heavy                  | Light                  | None                      | None                    | Light                     | Light                | None                  | None                    |
| Day 15              | Heavy                | Medium                  | Heavy                    | Light                 | Heavy                  | Heavy                  | N/S                       | N/S                     | None                      | None                 | Light                 | None                    |
| Day 16              | Heavy                | Heavy                   | Medium                   | Medium                | Heavy                  | Medium                 | N/S                       | N/S                     | None                      | None                 | Light                 | N/S                     |
| Day 17              | Heavy                | Heavy                   | None                     | Heavy                 | Heavy                  | None                   | N/S                       | N/S                     | None                      | N/S                  | None                  | N/S                     |
| Day 18              | Light                | Heavy                   | Light                    | Heavy                 | Light                  | Light                  | N/S                       | N/S                     | None                      | N/S                  | None                  | N/S                     |
| Day 19              | None                 | Heavy                   | Heavy                    | Heavy                 | Light                  | N/S                    | N/S                       | N/S                     | None                      | N/S                  | None                  | N/S                     |
| Day 20              | Light                | Heavy                   | Medium                   | Heavy                 | Light                  | N/S                    | N/S                       | N/S                     | Light                     | N/S                  | None                  | N/S                     |
| Day 21              | Medium               | Heavy                   | Heavy                    | Heavy                 | Light                  | N/S                    | N/S                       | N/S                     | Light                     | N/S                  | Medium                | N/S                     |
| Day 22              | N/S                  | Heavy                   | Heavy                    | Heavy                 | None                   | N/S                    | N/S                       | N/S                     | Light                     | N/S                  | Medium                | N/S                     |
| Day 23              | N/S                  | Heavy                   | Heavy                    | Medium                | None                   | N/S                    | N/S                       | N/S                     | Heavy                     | N/S                  | Light                 | N/S                     |
| Day 24              | N/S                  | Heavy                   | Heavy                    | Medium                | N/S                    | N/S                    | N/S                       | N/S                     | Heavy                     | N/S                  | N/S                   | N/S                     |
| Day 25              | N/S                  | Heavy                   | Heavy                    | Light                 | N/S                    | N/S                    | N/S                       | N/S                     | Medium                    | N/S                  | N/S                   | N/S                     |
| Day 26              | N/S                  | Heavy                   | Heavy                    | Medium                | N/S                    | N/S                    | N/S                       | N/S                     | Medium                    | N/S                  | N/S                   | N/S                     |
| Day 27              | N/S                  | N/S                     | Heavy                    | Heavy                 | N/S                    | N/S                    | N/S                       | N/S                     | None                      | N/S                  | N/S                   | N/S                     |
| Day 28              | N/S                  | N/S                     | None                     | Light                 | N/S                    | N/S                    | N/S                       | N/S                     | None                      | N/S                  | N/S                   | N/S                     |
| Day 29              | N/S                  | N/S                     | Light                    | Light                 | N/S                    | N/S                    | N/S                       | N/S                     | Medium                    | N/S                  | N/S                   | N/S                     |
| Day 30              | N/S                  | N/S                     | Heavy                    | None                  | N/S                    | N/S                    | N/S                       | N/S                     | Heavy                     | N/S                  | N/S                   | N/S                     |
| Day 31              | N/S                  | N/S                     | Medium                   | N/A                   | N/S                    | N/S                    | N/S                       | N/S                     | None                      | N/S                  | N/S                   | N/S                     |
| Day 32              | N/S                  | N/S                     | None                     | N/S                   | N/S                    | N/S                    | N/S                       | N/S                     | None                      | N/S                  | N/S                   | N/S                     |
| Day 33              | N/S                  | N/S                     | Light                    | N/S                   | N/S                    | N/S                    | N/S                       | N/S                     | None                      | N/S                  | N/S                   | N/S                     |
| Day 34              | N/S                  | N/S                     | None                     | N/S                   | N/S                    | N/S                    | N/S                       | N/S                     | None                      | N/S                  | N/S                   | N/S                     |
| Day 35              | N/S                  | N/S                     | None                     | N/S                   | N/S                    | N/S                    | N/S                       | N/S                     | None                      | N/S                  | N/S                   | N/S                     |
| Day 36              | N/S                  | N/S                     | None                     | N/S                   | N/S                    | N/S                    | N/S                       | N/S                     | None                      | N/S                  | N/S                   | N/S                     |
| Day 37              | N/S                  | N/S                     | None                     | N/S                   | N/S                    | N/S                    | N/S                       | N/S                     | N/A                       | N/S                  | N/S                   | N/S                     |
| Day 38              | N/S                  | N/S                     | Light                    | N/S                   | N/S                    | N/S                    | N/S                       | N/S                     | N/A                       | N/S                  | N/S                   | N/S                     |
| Day 39              | N/S                  | N/S                     | Light                    | N/S                   | N/S                    | N/S                    | N/S                       | N/S                     | N/A                       | N/S                  | N/S                   | N/S                     |
| Day 40              | N/S                  | N/S                     | Light                    | N/S                   | N/S                    | N/S                    | N/S                       | N/S                     | N/A                       | N/S                  | N/S                   | N/S                     |
| <b>Total None</b>   | <b>1</b>             | <b>0</b>                | <b>9</b>                 | <b>3</b>              | <b>3</b>               | <b>2</b>               | <b>2</b>                  | <b>2</b>                | <b>3</b>                  | <b>5</b>             | <b>2</b>              | <b>5</b>                |
| <b>Total Light</b>  | <b>5</b>             | <b>0</b>                | <b>7</b>                 | <b>7</b>              | <b>6</b>               | <b>3</b>               | <b>1</b>                  | <b>2</b>                | <b>3</b>                  | <b>8</b>             | <b>1</b>              | <b>3</b>                |
| <b>Total Medium</b> | <b>5</b>             | <b>2</b>                | <b>5</b>                 | <b>4</b>              | <b>6</b>               | <b>3</b>               | <b>1</b>                  | <b>5</b>                | <b>2</b>                  | <b>3</b>             | <b>2</b>              | <b>0</b>                |
| <b>Total Heavy</b>  | <b>9</b>             | <b>25</b>               | <b>18</b>                | <b>15</b>             | <b>8</b>               | <b>10</b>              | <b>10</b>                 | <b>5</b>                | <b>8</b>                  | <b>7</b>             | <b>5</b>              | <b>7</b>                |

**Table S11.** NOAA hazard mapping smoke impact after wildfires. N/A = not available N/S = not sampling.

| Day                 | Carson, WA<br>(n=23) | Sunriver, OR<br>(n=22) | Corvallis, OR<br>2 (n=22) | Seattle, WA 2<br>(n=22) | Richland, WA<br>(n=22) | Seattle, WA 1<br>(n=22) | Cobb, CA<br>(n=22) | McCall, ID<br>(n=22) | Sandpoint, ID<br>(n=24) | Lake Oswego,<br>OR (n=22) | Prineville,<br>OR (n=18) | Corvallis, OR<br>1 (n=29) |
|---------------------|----------------------|------------------------|---------------------------|-------------------------|------------------------|-------------------------|--------------------|----------------------|-------------------------|---------------------------|--------------------------|---------------------------|
| Day 1               | None                 | None                   | None                      | None                    | Medium                 | None                    | Light              | Light                | None                    | None                      | Light                    | None                      |
| Day 2               | None                 | None                   | None                      | None                    | None                   | None                    | Light              | Light                | Light                   | None                      | Light                    | None                      |
| Day 3               | Heavy                | None                   | None                      | None                    | None                   | None                    | Medium             | Light                | None                    | None                      | Medium                   | None                      |
| Day 4               | Medium               | None                   | None                      | None                    | Light                  | None                    | Heavy              | Medium               | None                    | None                      | Light                    | None                      |
| Day 5               | None                 | None                   | None                      | None                    | None                   | None                    | None               | Light                | Light                   | None                      | None                     | None                      |
| Day 6               | None                 | None                   | None                      | None                    | None                   | None                    | None               | None                 | None                    | None                      | None                     | None                      |
| Day 7               | None                 | None                   | None                      | None                    | Light                  | None                    | None               | None                 | Light                   | Light                     | None                     | None                      |
| Day 8               | None                 | None                   | None                      | None                    | None                   | None                    | None               | Light                | None                    | None                      | None                     | None                      |
| Day 9               | None                 | None                   | None                      | None                    | Light                  | None                    | None               | None                 | None                    | None                      | Light                    | None                      |
| Day 10              | None                 | None                   | None                      | None                    | None                   | None                    | None               | None                 | None                    | None                      | None                     | None                      |
| Day 11              | None                 | None                   | None                      | None                    | None                   | None                    | None               | Light                | None                    | None                      | None                     | None                      |
| Day 12              | None                 | None                   | None                      | None                    | None                   | None                    | None               | None                 | None                    | None                      | None                     | None                      |
| Day 13              | None                 | None                   | None                      | None                    | None                   | None                    | Light              | Light                | None                    | None                      | None                     | None                      |
| Day 14              | None                 | None                   | None                      | None                    | None                   | None                    | None               | None                 | None                    | None                      | None                     | None                      |
| Day 15              | None                 | None                   | None                      | None                    | None                   | None                    | None               | None                 | None                    | None                      | None                     | None                      |
| Day 16              | None                 | None                   | None                      | None                    | None                   | None                    | None               | None                 | None                    | None                      | None                     | None                      |
| Day 17              | None                 | None                   | None                      | None                    | None                   | None                    | None               | None                 | None                    | None                      | None                     | None                      |
| Day 18              | None                 | None                   | None                      | None                    | None                   | None                    | None               | None                 | None                    | None                      | None                     | None                      |
| Day 19              | None                 | None                   | None                      | None                    | None                   | None                    | None               | None                 | None                    | None                      | N/S                      | None                      |
| Day 20              | None                 | None                   | None                      | None                    | Light                  | None                    | None               | None                 | None                    | None                      | N/S                      | Light                     |
| Day 21              | None                 | None                   | None                      | None                    | None                   | None                    | None               | None                 | None                    | None                      | N/S                      | None                      |
| Day 22              | None                 | Light                  | None                      | None                    | Light                  | None                    | None               | None                 | None                    | None                      | N/S                      | None                      |
| Day 23              | None                 | N/S                    | N/S                       | N/S                     | N/S                    | N/S                     | N/S                | N/S                  | None                    | N/S                       | N/S                      | None                      |
| Day 24              | N/S                  | N/S                    | N/S                       | N/S                     | N/S                    | N/S                     | N/S                | N/S                  | None                    | N/S                       | N/S                      | None                      |
| Day 25              | N/S                  | N/S                    | N/S                       | N/S                     | N/S                    | N/S                     | N/S                | N/S                  | N/S                     | N/S                       | N/S                      | None                      |
| Day 26              | N/S                  | N/S                    | N/S                       | N/S                     | N/S                    | N/S                     | N/S                | N/S                  | N/S                     | N/S                       | N/S                      | Light                     |
| Day 27              | N/S                  | N/S                    | N/S                       | N/S                     | N/S                    | N/S                     | N/S                | N/S                  | N/S                     | N/S                       | N/S                      | Light                     |
| Day 28              | N/S                  | N/S                    | N/S                       | N/S                     | N/S                    | N/S                     | N/S                | N/S                  | N/S                     | N/S                       | N/S                      | Light                     |
| Day 29              | N/S                  | N/S                    | N/S                       | N/S                     | N/S                    | N/S                     | N/S                | N/S                  | N/S                     | N/S                       | N/S                      | None                      |
| <b>Total None</b>   | <b>21</b>            | <b>21</b>              | <b>22</b>                 | <b>22</b>               | <b>16</b>              | <b>22</b>               | <b>18</b>          | <b>14</b>            | <b>21</b>               | <b>21</b>                 | <b>13</b>                | <b>25</b>                 |
| <b>Total Light</b>  | <b>0</b>             | <b>1</b>               | <b>0</b>                  | <b>0</b>                | <b>5</b>               | <b>0</b>                | <b>2</b>           | <b>7</b>             | <b>3</b>                | <b>1</b>                  | <b>4</b>                 | <b>4</b>                  |
| <b>Total Medium</b> | <b>1</b>             | <b>0</b>               | <b>0</b>                  | <b>0</b>                | <b>1</b>               | <b>0</b>                | <b>1</b>           | <b>1</b>             | <b>0</b>                | <b>0</b>                  | <b>1</b>                 | <b>0</b>                  |
| <b>Total Heavy</b>  | <b>1</b>             | <b>0</b>               | <b>0</b>                  | <b>0</b>                | <b>0</b>               | <b>0</b>                | <b>1</b>           | <b>0</b>             | <b>0</b>                | <b>0</b>                  | <b>0</b>                 | <b>0</b>                  |

**Table S12.** Wildfire activity information during sampling. Wildfires were recorded, and corresponding information was collected based on smoke impact to sampling location. Data was collected from the National Wildfire Coordinating Group Incident Information System.

| Sampling Location | Wildfire Name(s)                                                                | Location                                     | Coordinates                                                                  | Overall Size (acres) | Total Acres | Distance from Wildfire (miles) |
|-------------------|---------------------------------------------------------------------------------|----------------------------------------------|------------------------------------------------------------------------------|----------------------|-------------|--------------------------------|
| Carson, WA        | Mosier Creek                                                                    | Wasco County                                 | 45.655 latitude, -121.376 longitude                                          | 985                  | 985         | 22                             |
| St Helena, CA     | LNU Lightning Complex (Hennessey, Gamble, 15-10, Spanish, Markley, 13-4, 11-16) | Napa County<br>Point Reyes National Seashore | 38.495 latitude, -122.35043 longitude<br>38.018 latitude, -122.839 longitude | 363,220<br>4,929     | 764,773     | 7<br>40                        |
|                   | Woodward SCU Lightning                                                          | Santa Clara County to Merced County          | 37.882 latitude, -121.777 longitude                                          | 396,624              |             | 57                             |
|                   | Laurel Fire                                                                     | Washington County                            | 44.755 latitude, -119.802 longitude                                          | 1,257                |             | 70                             |
| Prineville, OR    | Frog Fire                                                                       | Deschutes County                             | 44.467 latitude, -121.605 longitude                                          | 4,020                | 585,659     | 50                             |
|                   | Green Ridge                                                                     | Crook County                                 | 44.039 latitude, -120.528 longitude                                          | 4,338                |             | 14                             |
|                   | Lionshead P-515                                                                 | Warm Springs Reservation                     | 44.723 latitude, -121.679 longitude                                          | 204,469              |             | 65                             |
|                   | Beachie Creek                                                                   | Warm Springs Reservation                     | 44.773 latitude, -121.618 longitude                                          | 4,609                |             | 65                             |
|                   | Holiday Farm                                                                    | Marion County                                | 44.821 latitude, -122.188 longitude                                          | 193,573              |             | 87                             |
|                   | W-5 Cold Springs                                                                | Willamette National Forest                   | 44.172 latitude, -122.231 longitude                                          | 173,393              |             | 71                             |
| Alturas, CA       | Crane                                                                           | Lassen County                                | 41.029 latitude, -120.281 longitude                                          | 84,817               | 2,668,442   | 35                             |
|                   | Sheep                                                                           | Baker County                                 | 42.094 latitude, -120.269 longitude                                          | 2,993                |             | 44                             |
|                   | Red Salmon                                                                      | Plumas National Forest                       | 40.279 latitude, -120.761 longitude                                          | 29,570               |             | 85                             |
|                   | Poodle                                                                          | Six Rivers National Forest                   | 41.185 latitude, -123.433 longitude                                          | 144,698              |             | 152                            |
|                   | Slater/Devil                                                                    | Washoe County                                | 40.818 latitude, -119.648 longitude                                          | 13,606               |             | 66                             |
|                   | August Complex North Zone                                                       | Klamath National Forest                      | 41.766 latitude, -123.375 longitude                                          | 157,229              |             | 150                            |
|                   | North Complex                                                                   | Mendocino National Forest                    | 40.145 latitude, -122.754 longitude                                          | 1,032,648            |             | 146                            |
|                   | Claremont                                                                       | Lassen County                                | 40.091 latitude, -120.931 longitude                                          | 318,935              |             | 99                             |
|                   | Bear                                                                            | Plumas County                                | 39.858 latitude, -120.912 longitude                                          | 21,946               |             | 114                            |
|                   | August Complex                                                                  | Merced County                                | 39.811 latitude, -121.086 longitude                                          | 8,302                |             | 119                            |
|                   | South Obenchain                                                                 | Colusa County                                | 39.659 latitude, -122.809 longitude                                          | 755,603              |             | 173                            |
|                   | Two Four Two                                                                    | Jackson County                               | 42.467 latitude, -122.683 longitude                                          | 32,671               |             | 129                            |
|                   | Brattain                                                                        | Klamath County                               | 42.653 latitude, -121.869 longitude                                          | 14,473               |             | 105                            |
| Richland, WA      | Evans Canyon                                                                    | Lake County                                  | 42.572 latitude, -120.558 longitude                                          | 50,951               | 1,171,838   | 75                             |
|                   | Jungle Creek                                                                    | Yakima County                                | 46.854 latitude, -120.799 longitude                                          | 75,817               |             | 84                             |
|                   | Pearl Hill                                                                      | Okanogan-Wenatchee National Forest           | 47.036 latitude, -121.144 longitude                                          | 588                  |             | 105                            |
|                   | Cold Springs                                                                    | National Forest                              | 48.056 latitude, -119.484 longitude                                          | 223,730              |             | 128                            |
|                   | Lionshead                                                                       | Douglas County                               | 48.635 latitude, -119.818 longitude                                          | 189,923              |             | 169                            |
|                   | Beachie Creek                                                                   | Okanogan Highlands                           | 44.723 latitude, -121.679 longitude                                          | 204,469              |             | 158                            |
|                   | Riverside                                                                       | Warm Springs Reservation                     | 44.821 latitude, -122.188 longitude                                          | 193,573              |             | 170                            |
|                   | Whitney                                                                         | Marion County                                | 45.049 latitude, -122.062 longitude                                          | 138,054              |             | 156                            |
|                   | Babb-Malden/Manning                                                             | Mt. Hood National Forest                     | 47.707 latitude, -118.26 longitude                                           | 127,430              |             | 114                            |
|                   | Lionshead                                                                       | Lincoln County                               | 47.282 latitude, -117.428 longitude                                          | 18,254               |             | 115                            |
| Sunriver, OR      | Beachie Creek                                                                   | Whitman County                               | 44.723 latitude, -121.679 longitude                                          | 204,469              | 835,701     | 58                             |
|                   | W-5 Cold Springs                                                                | Warm Springs Reservation                     | 44.821 latitude, -122.188 longitude                                          | 193,573              |             | 74                             |
|                   | Crane                                                                           | Marion County                                | 44.821 latitude, -122.188 longitude                                          | 193,573              |             | 206                            |
|                   | Sheep                                                                           | Lassen County                                | 41.029 latitude, -120.281 longitude                                          | 84,817               |             | 138                            |
|                   | Red Salmon                                                                      | Baker County                                 | 42.094 latitude, -120.269 longitude                                          | 2,993                |             | 252                            |
|                   | Holiday Farm                                                                    | Plumas National Forest                       | 40.279 latitude, -120.761 longitude                                          | 29,570               |             | 210                            |
| Corvallis, OR     | Fox                                                                             | Six Rivers National Forest                   | 41.185 latitude, -123.433 longitude                                          | 144,698              | 571,435     | 45                             |
|                   | Lionshead                                                                       | Willamette National Forest                   | 44.172 latitude, -122.231 longitude                                          | 173,393              |             | 199                            |
|                   | Beachie Creek                                                                   | Siskiyou County                              | 41.212 latitude, -122.847 longitude                                          | 2,188                |             | 80                             |
|                   | Holiday Farm                                                                    | Warm Springs Reservation                     | 44.723 latitude, -121.679 longitude                                          | 204,469              |             | 57                             |
|                   |                                                                                 | Marion County                                | 44.821 latitude, -122.188 longitude                                          | 193,573              |             | 58                             |
|                   |                                                                                 | Willamette National Forest                   | 44.172 latitude, -122.231 longitude                                          | 173,393              |             |                                |

|                 |                     |                                      |                                     |         |         |     |
|-----------------|---------------------|--------------------------------------|-------------------------------------|---------|---------|-----|
| Seattle, WA     | Lionshead           | Warm Springs Reservation             | 44.723 latitude, -121.679 longitude | 204,469 | 839,458 | 205 |
|                 | Beachie Creek       | Marion County                        | 44.821 latitude, -122.188 longitude | 193,573 |         | 196 |
|                 | Chikamin            | Chelan County                        | 47.991 latitude, -120.7 longitude   | 1,685   |         | 80  |
|                 | Pearl Hill          | Douglas County                       | 48.056 latitude, -119.484 longitude | 223,730 |         | 137 |
|                 | Cold Springs        | Okanogan Highlands                   | 48.635 latitude, -119.818 longitude | 189,923 |         | 138 |
|                 | Palmer              | Okanogan Highlands                   | 48.837 latitude, -119.575 longitude | 17,988  |         | 152 |
|                 | Apples Acres        | Chelan County                        | 47.863 latitude, -119.95 longitude  | 5,500   |         | 115 |
|                 | Downey Creek        | Mt. Baker-Snoqualmie National Forest | 48.264 latitude, -121.21 longitude  | 2,570   |         | 68  |
|                 | Mt. Lena            | Olympic National Forest              | 47.615 latitude, -123.139 longitude | 20      |         | 36  |
| Lake Oswego, OR | Lionshead           | Warm Springs Reservation             | 44.723 latitude, -121.679 longitude | 204,469 | 553,538 | 70  |
|                 | Beachie Creek       | Marion County                        | 44.821 latitude, -122.188 longitude | 193,573 |         | 48  |
|                 | Riverside           | Mt Hood National Forest              | 45.181 latitude, -121.576 longitude | 138,054 |         | 56  |
|                 | White River         | Mt Hood National Forest              | 45.049 latitude, -122.062 longitude | 17,442  |         | 40  |
| McCall, ID      | Buck                | Valley County                        | 44.786 latitude, -115.476 longitude | 19,477  | 156,104 | 276 |
|                 | Porphyry            | Valley County                        | 45.248 latitude, -115.438 longitude | 14,486  |         | 40  |
|                 | Woodhead            | Washington County                    | 44.756 latitude, -116.877 longitude | 96,614  |         | 39  |
|                 | Bear Creek          | Lemhi County                         | 44.858 latitude, -113.437 longitude | 11,900  |         | 132 |
|                 | Shissler            | Idaho County                         | 45.76 latitude, -115.193 longitude  | 11,000  |         | 72  |
|                 | Trap                | Custer County                        | 44.312 latitude, -115.1 longitude   | 2,627   |         | 66  |
| Newport, OR     | Lionshead           | Warm Springs Reservation             | 44.723 latitude, -121.679 longitude | 204,469 | 571,435 | 118 |
|                 | Beachie Creek       | Marion County                        | 44.821 latitude, -122.188 longitude | 193,573 |         | 95  |
|                 | Holiday Farm        | Willamette National Forest           | 44.172 latitude, -122.231 longitude | 173,393 |         | 95  |
| Sandpoint, ID   | Callahan            | Latah County                         | 48.397 latitude, -116.089 longitude | 1,276   | 166,479 | 22  |
|                 | Inchelium Complex   | Ferry County                         | 48.331 latitude, -118.198 longitude | 19,399  |         | 76  |
|                 | Whitney             | Lincoln County                       | 47.707 latitude, -118.26 longitude  | 127,430 |         | 90  |
|                 | Babb-Malden/Manning | Whitman County                       | 47.282 latitude, -117.428 longitude | 18,254  |         | 84  |
|                 | West Branch         | Coleville National Forest            | 48.474 latitude, -117.044 longitude | 120     |         | 24  |

**Table S13.** Participant survey responses\*.  
\*NR – no response

| Location        | Event           | Air conditioning | Air conditioning on | Days air conditioning on | Windows Open | Days windows open | Home Age | Candle or incense use | Wood stove                                                 | Gas stove                         | Grilling or charbroiling food | Smoker | Smoking location |
|-----------------|-----------------|------------------|---------------------|--------------------------|--------------|-------------------|----------|-----------------------|------------------------------------------------------------|-----------------------------------|-------------------------------|--------|------------------|
| Richland, WA    | Before wildfire | yes              | yes                 | 14                       | no           | 0                 | 2010     | no                    | no                                                         | yes                               | NR                            | no     | NR               |
| Seattle, WA 1   | Before wildfire | yes              | yes                 | 15                       | yes          | 5                 | 2015     | NR                    | No response<br>yes<br>"wood stove season has started here" | No response                       | NR                            | NR     | NR               |
| Alturas, CA     | Before wildfire | yes              | no                  | 0                        | no           | 0                 | N/A      | no                    |                                                            | no                                | no                            | yes    | outside          |
| Cobb, CA        | Before wildfire | yes              | yes                 | 2                        | no           | 0                 | NR       | NR                    | NR                                                         | NR                                | NR                            | NR     | NR               |
| St. Helena, CA  | Before wildfire | yes              | yes                 | 10                       | yes          | 8                 | NR       | NR                    | NR                                                         | NR                                | NR                            | NR     | NR               |
| Sandpoint, ID   | Before wildfire | yes              | no                  | 0                        | yes          | 44                | 1980     | yes                   | NR                                                         | yes                               | no                            | no     | N/A              |
| Lake Oswego, OR | Before wildfire | yes              | yes                 | NR                       | no           | 0                 | 1975     | no                    | no                                                         | no                                | no                            | no     | no               |
| Newport, OR     | Before wildfire | no               | N/A                 | N/A                      | yes          | 0                 | NR       | NR                    | NR                                                         | NR                                | NR                            | NR     | NR               |
| Corvallis, OR 1 | Before wildfire | no               | N/A                 | N/A                      | yes          | >30               | 1972     | no                    | yes                                                        | yes                               | no                            | no     | N/A              |
| Richland, WA    | Wildfire        | yes              | yes                 | 21                       | no           | 0                 | 2010     | no                    | no                                                         | yes                               | yes                           | no     | N/A              |
| Seattle, WA 2   | Wildfire        | no               | N/A                 | N/A                      | yes          | 5                 | N/A      | yes                   | no                                                         | yes                               | yes                           | no     | N/A              |
| Carson, WA      | Wildfire        | NR               | NR                  | NR                       | NR           | NR                | NR       | NR                    | NR                                                         | NR                                | NR                            | NR     | NR               |
| Alturas, CA     | Wildfire        | yes              | yes                 | 5                        | no           | 0                 |          | no                    | yes                                                        | no                                | no                            | yes    | outside          |
| St. Helena, CA  | Wildfire        | yes              | yes                 | 7                        | yes          | 5                 | 1986     | no                    | no                                                         | yes                               | no                            | no     | N/A              |
| McCall, ID      | Wildfire        | no               | N/A                 | N/A                      | yes          | 6                 | NR       | NR                    | NR                                                         | NR                                | NR                            | NR     | NR               |
| Sandpoint, ID   | Wildfire        | NR               | NR                  | NR                       | NR           | NR                | NR       | NR                    | NR                                                         | NR                                | NR                            | NR     | NR               |
| Lake Oswego, OR | Wildfire        | NR               | NR                  | NR                       | NR           | NR                | NR       | NR                    | NR                                                         | NR                                | NR                            | NR     | NR               |
| Newport, OR     | Wildfire        | no               | N/A                 | N/A                      | no           | 0                 | NR       | NR                    | NR                                                         | NR                                | NR                            | NR     | NR               |
| Prineville, OR  | Wildfire        | no               | N/A                 | N/A                      | yes          | 5                 | 2006     | no                    | yes                                                        | yes                               | yes                           | no     | N/A              |
| Corvallis, OR 2 | Wildfire        | yes              | yes                 | 2                        | no           | 0                 | 1989     | no                    | yes                                                        | no                                | no                            | no     | N/A              |
| Sunriver, OR    | Wildfire        | no               | N/A                 | N/A                      | no           | 0                 |          | no                    | no                                                         | no                                | no                            | no     | N/A              |
| Richland, WA    | After wildfire  | NR               | NR                  | NR                       | NR           | NR                | N/A      | N/A                   | N/A                                                        | N/A                               | N/A                           | N/A    | N/A              |
| Seattle, WA 1   | After wildfire  | yes              | no                  | 0                        | yes          | 5                 | N/A      | N/A                   | N/A                                                        | N/A                               | N/A                           | N/A    | N/A              |
| Seattle WA 2    | After wildfire  | no               | N/A                 | N/A                      | yes          | 21                | 1996     | yes                   | no                                                         | yes                               | yes                           | no     | N/A              |
| Carson, WA      | After wildfire  | yes              | yes                 | 22                       | yes          | 2                 | NR       | NR                    | NR                                                         | NR                                | NR                            | NR     | NR               |
| Cobb, CA        | After wildfire  | yes              | yes                 | 4                        | no           | 0                 | N/A      | N/A                   | N/A                                                        | N/A                               | N/A                           | N/A    | N/A              |
| McCall, ID      | After wildfire  | no               | N/A                 | N/A                      | yes          | 21                | N/A      | N/A                   | N/A                                                        | N/A                               | N/A                           | N/A    | N/A              |
| Sandpoint, ID   | After wildfire  | NR               | NR                  | NR                       | NR           | NR                | N/A      | N/A                   | N/A                                                        | N/A                               | N/A                           | N/A    | N/A              |
| Lake Oswego, OR | After wildfire  | yes              | no                  | 0                        | no           | 0                 | N/A      | N/A                   | N/A                                                        | N/A                               | N/A                           | N/A    | N/A              |
| Prineville, OR  | After wildfire  | NR               | NR                  | NR                       | NR           | NR                | N/A      | N/A                   | N/A                                                        | N/A                               | N/A                           | N/A    | N/A              |
| Corvallis, OR 1 | After wildfire  | NR               | NR                  | NR                       | NR           | NR                | N/A      | N/A                   | N/A                                                        | N/A                               | N/A                           | N/A    | N/A              |
| Corvallis, OR 2 | After wildfire  | yes              | no                  | 0                        | yes          | 5                 | 1989     | no                    | yes                                                        | yes                               | no                            | no     | N/A              |
| Sunriver, OR    | After wildfire  | no               | N/A                 | N/A                      | no           | 0                 | NR       | no                    | no                                                         | yes<br>(gas fireplace was in use) | no                            | no     | N/A              |

\*NR – no response



**Table S14.** PAH air concentrations (ng/m<sup>3</sup>) before wildfires. Italicized values indicate 1/2 of the method detection limit (MDL).**a) Before wildfires indoor**

| Analyte                  | St Helena, CA | Richland, WA | Seattle, WA 1 | Alturas, CA | Cobb, CA | Sandpoint, ID | Lake Oswego, OR | Newport, OR | Corvallis, OR 1 |
|--------------------------|---------------|--------------|---------------|-------------|----------|---------------|-----------------|-------------|-----------------|
| naphthalene              | 40.2          | 307          | 99.1          | 268         | 361      | 398           | 223             | 152         | 244             |
| 2-methylnaphthalene      | 9.56          | 110          | 31.9          | 47.2        | 72.3     | 96.4          | 72.7            | 48.6        | 71.5            |
| 1-methylnaphthalene      | 5.64          | 56.4         | 19.5          | 33.3        | 43.9     | 56.5          | 38.4            | 32.1        | 38.7            |
| 2-ethylnaphthalene       | 0.728         | 5.99         | 2.02          | 4.19        | 4.41     | 8.26          | 5.46            | 4.86        | 3.82            |
| 2,6-dimethylnaphthalene  | 2.9           | 23.1         | 8.07          | 14.3        | 17.9     | 25.4          | 24.3            | 22.8        | 12.1            |
| 1,4-dimethylnaphthalene  | 1.12          | 3.64         | 0.93          | 2.77        | 3.37     | 3.23          | 4               | 2.71        | 1.63            |
| 1,5-dimethylnaphthalene  | 1.08          | 4.06         | 1.51          | 3.21        | 0.0388   | 3.66          | 4.78            | 3.99        | 1.82            |
| 1,2-dimethylnaphthalene  | 0.716         | 6.33         | 0.02645       | 4.5         | 0.03685  | 5.89          | 0.0439          | 0.03055     | 3.24            |
| acenaphthylene           | 0.0227        | 0.02155      | 3.09          | 1.22        | 8.4      | 0.03095       | 4.72            | 3.24        | 0.988           |
| 1,8-dimethylnaphthalene  | 0.0382        | 0.0362       | 0.0269        | 0.03725     | 0.0364   | 0.02485       | 0.0399          | 0.02815     | 0.0315          |
| acenaphthene             | 4.64          | 27.3         | 9.79          | 13.2        | 23.9     | 83.3          | 0.0575          | 20          | 24.4            |
| 2,6-diethylnaphthalene   | 0.00385       | 0.00361      | 0.00393       | 1.45        | 0.00960  | 1.10          | 0.0181          | 0.0118      | 0.421           |
| fluorene                 | 1.73          | 7.19         | 2.49          | 5.21        | 7.49     | 21.3          | 4.04            | 5.53        | 4.86            |
| dibenzothiophene         | 0.117         | 1.07         | 0.909         | 0.973       | 1.87     | 1.72          | 1.48            | 2.01        | 0.824           |
| phenanthrene             | 1.33          | 6.42         | 4.52          | 10.8        | 10.4     | 19.6          | 10.4            | 48.9        | 16.2            |
| anthracene               | 0.0489        | 0.00204      | 0.00345       | 0.285       | 0.00940  | 0.724         | 0.0188          | 2.37        | 0.00750         |
| 2-methylphenanthrene     | 0.118         | 0.971        | 1.91          | 2.20        | 0.993    | 1.64          | 3.18            | 2.46        | 0.988           |
| 1-methylphenanthrene     | 0.0384        | 0.000415     | 0.00224       | 0.00940     | 0.00680  | 0.0597        | 0.0143          | 0.191       | 0.00540         |
| 2-methylanthracene       | 0.000224      | 0.497        | 1.56          | 1.28        | 0.576    | 0.903         | 1.71            | 1.31        | 0.462           |
| 9-methylanthracene       | 0.000343      | 0.000345     | 0.00178       | 0.00750     | 0.00540  | 0.00500       | 0.0114          | 0.00735     | 0.00430         |
| 3,6-dimethylphenanthrene | 0.00302       | 0.0432       | 0.117         | 0.194       | 0.00242  | 0.151         | 0.221           | 0.113       | 0.0528          |
| 2,3-dimethylanthracene   | 0.000061      | 0.0166       | 0.00063       | 0.114       | 0.00196  | 0.0762        | 0.00415         | 0.00269     | 0.001555        |
| fluoranthene             | 0.0000960     | 0.000147     | 0.00177       | 0.0465      | 0.00555  | 0.00520       | 0.0118          | 0.00765     | 0.0261          |
| 9,10-dimethylanthracene  | 0.000102      | 0.0001395    | 0.00143       | 0.0062      | 0.00446  | 0.00417       | 0.0095          | 0.00615     | 0.003545        |
| pyrene                   | 0.000348      | 0.00302      | 0.00051       | 0.0524      | 0.00159  | 0.0281        | 0.00339         | 0.002195    | 0.0280          |
| retene                   | 0.0000462     | 0.0000735    | 0.000945      | 0.0974      | 0.00296  | 0.0220        | 0.00630         | 0.00409     | 0.0472          |
| benzo[a]fluorene         | 0.0001655     | 0.00133      | 0.00272       | 0.0619      | 0.0085   | 0.00795       | 0.0181          | 0.0117      | 0.0392          |
| benzo[b]fluorene         | 0.0000960     | 0.000147     | 0.00177       | 0.0465      | 0.00555  | 0.0052        | 0.0118          | 0.00765     | 0.0261          |
| benzo[c]fluorene         | 0.0000361     | 0.0000486    | 0.000491      | 0.00766     | 0.00153  | 0.00143       | 0.00325         | 0.00211     | 0.00714         |
| 1-methylpyrene           | 0.000348      | 0.00302      | 0.000510      | 0.0524      | 0.00159  | 0.0281        | 0.00339         | 0.002195    | 0.0280          |
| benz[a]anthracene        | 0.0000462     | 0.0000735    | 0.000945      | 0.0974      | 0.00296  | 0.0220        | 0.0063          | 0.00409     | 0.0472          |
| cyclopenta[cd]pyrene     | 0.0000217     | 0.0000350    | 0.000454      | 0.108       | 0.001425 | 0.001335      | 0.00304         | 0.00197     | 0.00113         |
| triphenylene             | 0.0000158     | 0.000561     | 0.000291      | 0.0361      | 0.000910 | 0.0186        | 0.00195         | 0.00126     | 0.0210          |

|                                |            |            |           |          |          |          |          |          |          |
|--------------------------------|------------|------------|-----------|----------|----------|----------|----------|----------|----------|
| chrysene                       | 0.0000266  | 0.0000425  | 0.000545  | 0.0460   | 0.00171  | 0.00160  | 0.00364  | 0.00236  | 0.0291   |
| 5-methylchrysene               | 0.0000805  | 0.000129   | 0.00167   | 0.00730  | 0.00525  | 0.00491  | 0.0112   | 0.00725  | 0.00416  |
| 6-methylchrysene               | 0.0000429  | 0.0000690  | 0.000890  | 0.00390  | 0.00279  | 0.00262  | 0.00595  | 0.00386  | 0.00222  |
| benzo[b]fluoranthene           | 0.0000141  | 0.0000227  | 0.000295  | 0.0477   | 0.000925 | 0.000870 | 0.00198  | 0.00128  | 0.0242   |
| 7,12-dimethylbenz[a]anthracene | 0.000152   | 0.0000765  | 0.000975  | 0.004275 | 0.00306  | 0.00287  | 0.0065   | 0.004225 | 0.00243  |
| benzo[k]fluoranthene           | 0.0000175  | 0.0000283  | 0.000369  | 0.0216   | 0.00116  | 0.001085 | 0.002475 | 0.0016   | 0.0112   |
| benzo[j]fluoranthene           | 0.0000194  | 0.00003145 | 0.0004105 | 0.0234   | 0.00129  | 0.00121  | 0.00275  | 0.00178  | 0.0123   |
| benzo[e]pyrene                 | 0.0000188  | 0.0000304  | 0.000397  | 0.0219   | 0.00125  | 0.00117  | 0.00266  | 0.00173  | 0.0109   |
| benzo[a]pyrene                 | 0.0000372  | 0.0000600  | 0.000785  | 0.00345  | 0.00247  | 0.00232  | 0.00525  | 0.00341  | 0.00196  |
| perylene                       | 0.0000416  | 0.0000675  | 0.000880  | 0.00386  | 0.00276  | 0.00259  | 0.00590  | 0.00382  | 0.00219  |
| indeno[1,2,3-cd]pyrene         | 0.00000640 | 0.0000104  | 0.000136  | 0.0204   | 0.000426 | 0.000400 | 0.000910 | 0.000590 | 0.000339 |
| dibenzo[a,h]anthracene         | 0.0000231  | 0.0000375  | 0.000490  | 0.00215  | 0.00154  | 0.00145  | 0.00329  | 0.00213  | 0.00122  |
| benzo[a]chrysene               | 0.0000166  | 0.0000269  | 0.000352  | 0.00155  | 0.00111  | 0.00104  | 0.00236  | 0.00153  | 0.000880 |
| benzo[ghi]perylene             | 0.00000850 | 0.0000138  | 0.000181  | 0.0111   | 0.000565 | 0.000530 | 0.00121  | 0.000780 | 0.00772  |
| anthanthrene                   | 0.00000620 | 0.0000101  | 0.000132  | 0.0164   | 0.000413 | 0.000387 | 0.000880 | 0.000570 | 0.000328 |
| naphtho[1,2-b]fluoranthene     | 0.0000266  | 0.0000432  | 0.000565  | 0.00248  | 0.00178  | 0.00166  | 0.00379  | 0.00245  | 0.00141  |
| naphtho[2,3-b]fluoranthene     | 0.0000266  | N/A        | N/A       | N/A      | N/A      | N/A      | N/A      | N/A      | N/A      |
| dibenzo[a,e]fluoranthene       | 0.00000750 | 0.0000122  | 0.000159  | 0.000695 | 0.000499 | 0.000468 | 0.00107  | 0.000690 | 0.000397 |
| dibenzo[a,l]pyrene             | 0.00000655 | 0.0000107  | 0.000140  | 0.000610 | 0.000438 | 0.000412 | 0.000935 | 0.000605 | 0.000348 |
| naphtho[2,3-k]fluoranthene     | 0.0000266  | 0.0000432  | 0.000565  | 0.00248  | 0.00178  | 0.00166  | 0.00379  | 0.00245  | 0.00141  |
| naphtho[2,3-e]pyrene           | 0.0000266  | 0.0000432  | 0.000565  | 0.00248  | 0.00178  | 0.00166  | 0.00379  | 0.00245  | 0.00141  |
| dibenzo[a,e]pyrene             | 0.0000880  | 0.000143   | 0.00187   | 0.00820  | 0.00585  | 0.00550  | 0.0125   | 0.00810  | 0.00467  |
| coronene                       | 0.00000800 | 0.0000130  | 0.000170  | 0.000745 | 0.000535 | 0.000500 | 0.00114  | 0.000740 | 0.000424 |
| dibenzo[e,l]pyrene             | 0.0000266  | 0.0000432  | 0.000565  | 0.00248  | 0.00178  | 0.00166  | 0.00379  | 0.00245  | 0.00141  |
| naphtho[2,3-a]pyrene           | 0.0000266  | 0.0000432  | 0.000565  | 0.00248  | 0.00178  | 0.00166  | 0.00379  | 0.00245  | 0.00141  |
| benzo[b]perylene               | 0.0000266  | 0.0000432  | 0.000565  | 0.00248  | 0.00178  | 0.00166  | 0.00379  | 0.00245  | 0.00141  |
| dibenzo[a,i]pyrene             | 0.00002267 | 0.0000368  | 0.000480  | 0.00211  | 0.00151  | 0.00142  | 0.00322  | 0.00209  | 0.00120  |

## b) Before wildfires outdoor

| Analyte                 | St Helena, CA | Richland, WA | Seattle, WA 1 | Alturas, CA | Cobb, CA | Sandpoint, ID | Lake Oswego, OR | Newport, OR | Corvallis, OR 1 |
|-------------------------|---------------|--------------|---------------|-------------|----------|---------------|-----------------|-------------|-----------------|
| naphthalene             | 27.7          | 27.5         | 124           | 72.8        | 55.6     | 195           | 52.7            | 65.7        | 28.9            |
| 2-methylnaphthalene     | 2.88          | 3.98         | 26.3          | 11.7        | 4.71     | 33.4          | 9.74            | 8.01        | 6.54            |
| 1-methylnaphthalene     | 1.71          | 2.24         | 14            | 9.06        | 2.86     | 20.5          | 6.65            | 5.92        | 5.42            |
| 2-ethylnaphthalene      | 0.226         | 0.136        | 1.26          | 0.863       | 0.38     | 1.77          | 0.686           | 0.657       | 0.489           |
| 2,6-dimethylnaphthalene | 0.682         | 0.418        | 2.91          | 2.25        | 0.796    | 4.36          | 1.78            | 1.39        | 1.48            |
| 1,4-dimethylnaphthalene | 0.0444        | 1.06         | 0.402         | 0.681       | 0.162    | 0.694         | 0.332           | 0.287       | 0.313           |

|                                |           |           |           |          |           |            |           |           |           |
|--------------------------------|-----------|-----------|-----------|----------|-----------|------------|-----------|-----------|-----------|
| 1,5-dimethylnaphthalene        | 0.195     | 0.0764    | 0.351     | 0.629    | 0.0227    | 0.83       | 0.338     | 0.307     | 0.342     |
| 1,2-dimethylnaphthalene        | 0.155     | 0.169     | 0.0357    | 0.905    | 0.0218    | 1.28       | 0.0264    | 0.0177    | 0.566     |
| acenaphthylene                 | 0.0240    | 0.0125    | 0.229     | 0.721    | 0.0134    | 1.22       | 0.0161    | 0.642     | 0.206     |
| 1,8-dimethylnaphthalene        | 0.04045   | 0.0206    | 0.0363    | 0.0830   | 0.0222    | 0.0124     | 0.0268    | 0.0179    | 0.0192    |
| acenaphthene                   | 1.84      | 4.27      | 3.48      | 3.45     | 0.03305   | 19.8       | 2.27      | 2.29      | 5.9       |
| 2,6-diethylnaphthalene         | 0.00412   | 0.0106    | 0.00363   | 0.118    | 0.00199   | 0.000990   | 0.00251   | 0.00192   | 0.0323    |
| fluorene                       | 0.766     | 0.69      | 1.12      | 1.59     | 0.313     | 5.98       | 0.82      | 0.641     | 2.04      |
| dibenzothiophene               | 0.0315    | 0.0149    | 0.0664    | 0.0267   | 0.0133    | 0.109      | 0.0305    | 0.0285    | 0.029     |
| phenanthrene                   | 0.755     | 0.474     | 1.83      | 3.04     | 0.321     | 6.41       | 0.738     | 0.921     | 1.23      |
| anthracene                     | 0.0275    | 0.0149    | 0.00217   | 0.366    | 0.00118   | 0.513      | 0.00149   | 0.0779    | 0.095     |
| 2-methylphenanthrene           | 0.0550    | 0.0340    | 0.180     | 0.295    | 0.0300    | 0.200      | 0.0565    | 0.107     | 0.267     |
| 1-methylphenanthrene           | 0.0214    | 0.00170   | 0.000770  | 0.0460   | 0.000354  | 0.0124     | 0.000483  | 0.000890  | 0.000290  |
| 2-methylanthracene             | 0.000261  | 0.0191    | 0.0941    | 0.291    | 0.0163    | 0.129      | 0.0327    | 0.0659    | 0.111     |
| 9-methylanthracene             | 0.000409  | 0.000257  | 0.000625  | 0.00845  | 0.000288  | 0.00185    | 0.000391  | 0.000710  | 0.000236  |
| 3,6-dimethylphenanthrene       | 0.00193   | 0.00252   | 0.00957   | 0.0160   | 0.000102  | 0.00516    | 0.00272   | 0.000305  | 0.0205    |
| 2,3-dimethylanthracene         | 0.0000920 | 0.00193   | 0.000190  | 0.0264   | 0.0000830 | 0.00301    | 0.000116  | 0.000247  | 0.0000670 |
| fluoranthene                   | 0.0276    | 0.0264    | 0.121     | 0.424    | 0.0169    | 0.258      | 0.0350    | 0.111     | 0.0486    |
| 9,10-dimethylanthracene        | 0.000175  | 0.000155  | 0.000407  | 0.000635 | 0.000176  | 0.0000640  | 0.000247  | 0.000555  | 0.000143  |
| pyrene                         | 0.0127    | 0.0192    | 0.114     | 0.407    | 0.0140    | 0.139      | 0.0261    | 0.0988    | 0.0495    |
| retene                         | 0.00368   | 0.0234    | 0.0596    | 0.610    | 0.0113    | 0.134      | 0.0206    | 0.0649    | 0.0459    |
| benzo[a]fluorene               | 0.000306  | 0.00138   | 0.00476   | 0.0358   | 0.000323  | 0.00491    | 0.000455  | 0.00658   | 0.00225   |
| benzo[b]fluorene               | 0.000187  | 0.000181  | 0.000482  | 0.0192   | 0.000206  | 0.00245    | 0.000291  | 0.00439   | 0.00149   |
| benzo[c]fluorene               | 0.0000610 | 0.000151  | 0.000140  | 0.0195   | 0.0000605 | 0.00242    | 0.0000850 | 0.000191  | 0.000812  |
| 1-methylpyrene                 | 0.000630  | 0.000982  | 0.00411   | 0.0244   | 0.0000590 | 0.00268    | 0.0000835 | 0.000197  | 0.0023    |
| benz[a]anthracene              | 0.0000950 | 0.000934  | 0.000254  | 0.0523   | 0.000108  | 0.00372    | 0.000153  | 0.000365  | 0.00219   |
| cyclopenta[cd]pyrene           | 0.0000450 | 0.0000455 | 0.000122  | 0.0294   | 0.0000520 | 0.00134    | 0.0000730 | 0.000175  | 0.0000420 |
| triphenylene                   | 0.000935  | 0.000826  | 0.0000795 | 0.00882  | 0.0000339 | 0.00105    | 0.000048  | 0.000113  | 0.00112   |
| chrysene                       | 0.0000545 | 0.000327  | 0.000146  | 0.0444   | 0.0000620 | 0.00373    | 0.0000880 | 0.000210  | 0.00192   |
| 5-methylchrysene               | 0.000166  | 0.0001675 | 0.0004475 | 0.00267  | 0.0001905 | 0.000068   | 0.000269  | 0.000645  | 0.0001545 |
| 6-methylchrysene               | 0.0000885 | 0.000089  | 0.0002385 | 0.000397 | 0.0001015 | 0.00003625 | 0.0001435 | 0.0003435 | 0.0000825 |
| benzo[b]fluoranthene           | 0.0000292 | 0.0000296 | 0.0000790 | 0.0166   | 0.0000337 | 0.000763   | 0.0000475 | 0.000114  | 0.000732  |
| 7,12-dimethylbenz[a]anthracene | 0.0000985 | 0.0000980 | 0.000263  | 0.000435 | 0.000112  | 0.000040   | 0.000158  | 0.000377  | 0.0000905 |
| benzo[k]fluoranthene           | 0.0000365 | 0.0000370 | 0.0000990 | 0.00789  | 0.0000421 | 0.000328   | 0.0000595 | 0.000143  | 0.000313  |
| benzo[j]fluoranthene           | 0.0000405 | 0.0000411 | 0.000110  | 0.0127   | 0.0000468 | 0.000436   | 0.0000660 | 0.000159  | 0.000248  |
| benzo[e]pyrene                 | 0.0000392 | 0.0000397 | 0.000106  | 0.00761  | 0.0000453 | 0.000323   | 0.0000640 | 0.000154  | 0.000293  |
| benzo[a]pyrene                 | 0.0000775 | 0.0000785 | 0.000211  | 0.00155  | 0.0000895 | 0.0000319  | 0.000127  | 0.000304  | 0.0000725 |

|                                   |           |           |           |           |           |            |           |           |           |
|-----------------------------------|-----------|-----------|-----------|-----------|-----------|------------|-----------|-----------|-----------|
| <i>perylene</i>                   | 0.0000865 | 0.0000880 | 0.000235  | 0.000393  | 0.000100  | 0.0000357  | 0.000142  | 0.000340  | 0.0000810 |
| <i>indeno[1,2,3-cd]pyrene</i>     | 0.0000134 | 0.0000136 | 0.0000363 | 0.00391   | 0.0000155 | 0.000210   | 0.0000218 | 0.0000525 | 0.0000125 |
| <i>dibenzo[a,h]anthracene</i>     | 0.0000483 | 0.0000490 | 0.000131  | 0.000219  | 0.0000560 | 0.0000199  | 0.0000790 | 0.000189  | 0.0000453 |
| <i>benzo[a]chrysene</i>           | 0.0000347 | 0.0000352 | 0.0000940 | 0.000157  | 0.0000401 | 0.0000143  | 0.0000565 | 0.000136  | 0.0000325 |
| <i>benzo[ghi]perylene</i>         | 0.0000178 | 0.0000181 | 0.0000483 | 0.00356   | 0.0000206 | 0.000149   | 0.0000290 | 0.0000695 | 0.0000167 |
| <i>anthanthrene</i>               | 0.0000130 | 0.0000132 | 0.0000351 | 0.00211   | 0.0000150 | 0.00000535 | 0.0000211 | 0.0000505 | 0.0000121 |
| <i>naphtho[1,2-b]fluoranthene</i> | 0.0000555 | 0.0000565 | 0.000151  | 0.000252  | 0.0000645 | 0.0000229  | 0.0000910 | 0.000218  | 0.0000520 |
| <i>naphtho[2,3-b]fluoranthene</i> | 0.0000555 | N/A       | N/A       | N/A       | N/A       | N/A        | N/A       | N/A       | N/A       |
| <i>dibenzo[a,e]fluoranthene</i>   | 0.0000157 | 0.0000159 | 0.0000425 | 0.0000710 | 0.0000181 | 0.00000645 | 0.0000256 | 0.0000615 | 0.0000147 |
| <i>dibenzo[a,l]pyrene</i>         | 0.0000138 | 0.0000140 | 0.0000373 | 0.0000620 | 0.0000159 | 0.00000565 | 0.0000224 | 0.0000540 | 0.0000129 |
| <i>naphtho[2,3-k]fluoranthene</i> | 0.0000555 | 0.0000565 | 0.000151  | 0.000252  | 0.0000645 | 0.0000229  | 0.0000910 | 0.000218  | 0.0000520 |
| <i>naphtho[2,3-e]pyrene</i>       | 0.0000555 | 0.0000565 | 0.000151  | 0.000252  | 0.0000645 | 0.0000229  | 0.0000910 | 0.000218  | 0.0000520 |
| <i>dibenzo[a,e]pyrene</i>         | 0.000184  | 0.000187  | 0.000500  | 0.000835  | 0.000213  | 0.0000760  | 0.000301  | 0.0007200 | 0.000173  |
| <i>coronene</i>                   | 0.0000168 | 0.0000170 | 0.0000455 | 0.0000760 | 0.0000194 | 0.0000069  | 0.0000274 | 0.0000655 | 0.0000157 |
| <i>dibenzo[e,l]pyrene</i>         | 0.0000555 | 0.0000565 | 0.000151  | 0.000252  | 0.0000645 | 0.0000229  | 0.0000910 | 0.000218  | 0.0000520 |
| <i>naphtho[2,3-a]pyrene</i>       | 0.0000555 | 0.0000565 | 0.000151  | 0.000252  | 0.0000645 | 0.0000229  | 0.0000910 | 0.000218  | 0.0000520 |
| <i>benzo[b]perylene</i>           | 0.0000555 | 0.0000565 | 0.000151  | 0.000252  | 0.0000645 | 0.0000229  | 0.0000910 | 0.000218  | 0.0000520 |
| <i>dibenzo[a,i]pyrene</i>         | 0.0000473 | 0.0000480 | 0.000129  | 0.000215  | 0.0000545 | 0.0000195  | 0.0000770 | 0.000186  | 0.000044  |
| <i>dibenzo[a,h]pyrene</i>         | 0.0000174 | 0.0000176 | 0.0000471 | 0.0000785 | 0.0000200 | 0.00000715 | 0.0000283 | 0.0000680 | 0.0000163 |

**Table S15.** PAH air concentrations (ng/m<sup>3</sup>) during wildfires. Italicized values indicate 1/2 MDL.**a) During wildfires indoor**

| Analyte                  | Carson, WA | St Helena, CA | Prineville, OR | Alturas, CA | Richland, WA | Sunriver, OR | Corvallis, OR 2 | Seattle, WA 2 | Lake Oswego, OR | McCall, ID | Newport, OR | Sandpoint, ID |
|--------------------------|------------|---------------|----------------|-------------|--------------|--------------|-----------------|---------------|-----------------|------------|-------------|---------------|
| naphthalene              | 613        | 109           | 71.1           | 256         | 532          | 146          | 345             | 267           | 357             | 436        | 137         | 2860          |
| 2-methylnaphthalene      | 269        | 32.8          | 12.9           | 37.6        | 215          | 41.5         | 35.1            | 41.6          | 184             | 164        | 35.0        | 282           |
| 1-methylnaphthalene      | 138        | 19.4          | 5.82           | 23.1        | 111          | 25.0         | 21.9            | 22.3          | 102             | 129        | 25.7        | 146           |
| 2-ethylnaphthalene       | 13.7       | 2.74          | 0.823          | 3.74        | 10.8         | 4.81         | 5.63            | 0.0307        | 13.8            | 18.7       | 3.96        | 23.1          |
| 2,6-dimethylnaphthalene  | 47.3       | 9.57          | 1.98           | 13.6        | 34.0         | 19.9         | 16.7            | 13.2          | 47.9            | 64.3       | 14.3        | 47.2          |
| 1,4-dimethylnaphthalene  | 6.07       | 2.25          | 0.391          | 2.03        | 3.86         | 3.68         | 3.90            | 2.60          | 5.70            | 7.03       | 1.93        | 5.18          |
| 1,5-dimethylnaphthalene  | 13.0       | 3.78          | 0.695          | 3.33        | 6.74         | 6.30         | 3.90            | 3.34          | 8.37            | 13.5       | 3.17        | 7.65          |
| 1,2-dimethylnaphthalene  | 5.96       | 3.48          | 0.911          | 2.54        | 4.51         | 6.02         | 7.41            | 3.15          | 6.15            | 8.04       | 2.13        | 5.24          |
| acenaphthylene           | 0.0293     | 0.0394        | 0.0267         | 0.214       | 0.0272       | 0.0296       | 1.62            | 0.240         | 0.506           | 1.77       | 0.788       | 0.0620        |
| 1,8-dimethylnaphthalene  | 0.0305     | 0.0451        | 0.0303         | 0.0447      | 0.0379       | 0.0319       | 0.0434          | 0.0294        | 0.0498          | 0.0660     | 0.0329      | 0.0354        |
| acenaphthene             | 11.6       | 12.3          | 0.0449         | 11.6        | 16.4         | 0.0472       | 8.64            | 19.7          | 25.9            | 9.44       | 8.38        | 365           |
| 2,6-diethylnaphthalene   | 0.00740    | 0.00995       | 0.00655        | 0.00985     | 0.00615      | 0.00740      | 0.0178          | 0.00910       | 0.0267          | 0.0402     | 0.0164      | 0.0181        |
| fluorene                 | 6.13       | 2.78          | 1.44           | 4.94        | 7.91         | 7.08         | 5.72            | 6.21          | 6.64            | 11.6       | 2.45        | 58.3          |
| dibenzothiophene         | 0.893      | 1.45          | 0.236          | 1.02        | 4.50         | 5.14         | 1.62            | 1.19          | 1.26            | 12.8       | 0.651       | 2.16          |
| phenanthrene             | 6.25       | 6.31          | 2.50           | 14.3        | 20.0         | 22.9         | 8.12            | 8.76          | 12.0            | 39.4       | 7.15        | 30.7          |
| anthracene               | 0.212      | 0.00935       | 0.0507         | 0.00925     | 0.00545      | 0.00715      | 0.0182          | 0.00915       | 0.0280          | 0.948      | 0.334       | 0.868         |
| 2-methylphenanthrene     | 0.922      | 1.46          | 0.474          | 3.19        | 6.94         | 9.17         | 1.36            | 0.932         | 3.72            | 18.8       | 0.806       | 1.53          |
| 1-methylphenanthrene     | 0.498      | 0.772         | 0.337          | 1.59        | 4.64         | 6.64         | 0.832           | 0.478         | 1.76            | 16.5       | 0.46        | 0.708         |
| 2-methylanthracene       | 0.00243    | 0.00309       | 0.00207        | 0.00306     | 0.00170      | 0.00240      | 0.00645         | 0.00317       | 0.332           | 0.0154     | 0.00615     | 0.0068        |
| 9-methylanthracene       | 0.00412    | 0.00525       | 0.00351        | 0.00520     | 0.00288      | 0.00406      | 0.0110          | 0.00535       | 0.0171          | 0.0262     | 0.0105      | 0.01155       |
| 3,6-dimethylphenanthrene | 0.0582     | 0.0785        | 0.00157        | 0.167       | 0.374        | 0.320        | 0.0766          | 0.0538        | 0.251           | 1.2        | 0.0411      | 0.0779        |
| 2,3-dimethylanthracene   | 0.00149    | 0.00189       | 0.00127        | 0.00187     | 0.00102      | 0.00147      | 0.00400         | 0.00196       | 0.00630         | 0.00960    | 0.00383     | 0.004235      |
| fluoranthene             | 0.234      | 0.273         | 0.143          | 1.06        | 0.424        | 0.234        | 0.312           | 0.574         | 0.407           | 1.1        | 0.445       | 0.683         |
| 9,10-dimethylanthracene  | 0.00339    | 0.00428       | 0.00288        | 0.00423     | 0.00232      | 0.00334      | 0.00910         | 0.00446       | 0.0144          | 0.0220     | 0.00875     | 0.0097        |
| pyrene                   | 0.221      | 0.234         | 0.218          | 0.524       | 0.496        | 0.353        | 0.438           | 0.308         | 0.751           | 1.03       | 0.304       | 0.35          |
| retene                   | 0.116      | 0.253         | 0.948          | 0.442       | 0.638        | 0.869        | 1.11            | 0.305         | 2.36            | 1.04       | 0.443       | 0.304         |
| benzo[a]fluorene         | 0.00645    | 0.00815       | 0.00545        | 0.00805     | 0.0186       | 0.00635      | 0.0174          | 0.00850       | 0.0274          | 0.0420     | 0.0167      | 0.0185        |
| benzo[b]fluorene         | 0.00421    | 0.00530       | 0.00357        | 0.00525     | 0.00286      | 0.00414      | 0.0114          | 0.00555       | 0.0179          | 0.0274     | 0.0109      | 0.0121        |
| benzo[c]fluorene         | 0.00116    | 0.00147       | 0.000985       | 0.00145     | 0.000795     | 0.00115      | 0.00313         | 0.00153       | 0.00492         | 0.00755    | 0.00300     | 0.00332       |
| 1-methylpyrene           | 0.0184     | 0.0188        | 0.0115         | 0.0242      | 0.0388       | 0.0143       | 0.0364          | 0.00159       | 0.0616          | 0.0974     | 0.00313     | 0.00346       |
| benz[a]anthracene        | 0.00225    | 0.00284       | 0.0145         | 0.00280     | 0.0146       | 0.0161       | 0.0566          | 0.0183        | 0.0744          | 0.0147     | 0.00585     | 0.00645       |
| cyclopenta[cd]pyrene     | 0.00108    | 0.00137       | 0.000920       | 0.00135     | 0.000735     | 0.00107      | 0.00293         | 0.001425      | 0.00460         | 0.00705    | 0.00281     | 0.00311       |

|                                       |          |          |          |          |          |          |          |          |         |         |          |          |
|---------------------------------------|----------|----------|----------|----------|----------|----------|----------|----------|---------|---------|----------|----------|
| <i>triphenylene</i>                   | 0.0145   | 0.000875 | 0.0141   | 0.0223   | 0.0120   | 0.0166   | 0.00187  | 0.0162   | 0.0525  | 0.00452 | 0.00180  | 0.00199  |
| <i>chrysene</i>                       | 0.00130  | 0.0133   | 0.00818  | 0.00162  | 0.00786  | 0.0077   | 0.00350  | 0.00171  | 0.00550 | 0.00845 | 0.00336  | 0.00372  |
| <i>5-methylchrysene</i>               | 0.00398  | 0.00500  | 0.00338  | 0.00496  | 0.00270  | 0.00392  | 0.0108   | 0.00525  | 0.0169  | 0.0260  | 0.0103   | 0.0114   |
| <i>6-methylchrysene</i>               | 0.00212  | 0.00268  | 0.00180  | 0.00265  | 0.00144  | 0.00209  | 0.00570  | 0.002795 | 0.00900 | 0.0139  | 0.00550  | 0.00610  |
| <i>benzo[b]fluoranthene</i>           | 0.000705 | 0.000885 | 0.000595 | 0.000875 | 0.00956  | 0.000690 | 0.0348   | 0.00093  | 0.00299 | 0.00460 | 0.00183  | 0.00202  |
| <i>7,12-dimethylbenz[a]anthracene</i> | 0.00233  | 0.00293  | 0.00197  | 0.00290  | 0.00158  | 0.00229  | 0.00630  | 0.003065 | 0.00990 | 0.0152  | 0.00600  | 0.00665  |
| <i>benzo[k]fluoranthene</i>           | 0.000880 | 0.00111  | 0.000745 | 0.00110  | 0.000600 | 0.000865 | 0.00238  | 0.00116  | 0.00375 | 0.00575 | 0.00229  | 0.00253  |
| <i>benzo[j]fluoranthene</i>           | 0.000980 | 0.00124  | 0.000830 | 0.00122  | 0.00148  | 0.000965 | 0.00694  | 0.00129  | 0.0106  | 0.00640 | 0.00254  | 0.00281  |
| <i>benzo[e]pyrene</i>                 | 0.000945 | 0.00120  | 0.00299  | 0.00118  | 0.00305  | 0.00303  | 0.0171   | 0.00125  | 0.00403 | 0.00620 | 0.00246  | 0.00272  |
| <i>benzo[a]pyrene</i>                 | 0.00188  | 0.00237  | 0.00159  | 0.00234  | 0.00127  | 0.00185  | 0.0219   | 0.00247  | 0.0176  | 0.0123  | 0.00486  | 0.00540  |
| <i>perylene</i>                       | 0.00210  | 0.00265  | 0.00178  | 0.00262  | 0.00142  | 0.00207  | 0.00565  | 0.00277  | 0.00890 | 0.0137  | 0.00545  | 0.00600  |
| <i>indeno[1,2,3-cd]pyrene</i>         | 0.000324 | 0.000408 | 0.000275 | 0.000403 | 0.000220 | 0.000319 | 0.0266   | 0.000427 | 0.00138 | 0.00211 | 0.000840 | 0.000930 |
| <i>dibenzo[a,h]anthracene</i>         | 0.00117  | 0.00148  | 0.000990 | 0.00146  | 0.000795 | 0.00115  | 0.00316  | 0.00154  | 0.00497 | 0.00765 | 0.00303  | 0.00336  |
| <i>benzo[a]chrysene</i>               | 0.000840 | 0.00106  | 0.000710 | 0.00105  | 0.000570 | 0.000825 | 0.00227  | 0.00111  | 0.00357 | 0.00550 | 0.00218  | 0.00241  |
| <i>benzo[ghi]perylene</i>             | 0.000431 | 0.000540 | 0.000365 | 0.000535 | 0.00214  | 0.000424 | 0.0145   | 0.00508  | 0.0107  | 0.00281 | 0.00112  | 0.00124  |
| <i>anthanthrene</i>                   | 0.000313 | 0.000395 | 0.000266 | 0.000391 | 0.000213 | 0.000309 | 0.000845 | 0.000413 | 0.00133 | 0.00205 | 0.000810 | 0.000900 |
| <i>naphtho[1,2-b]fluoranthene</i>     | 0.00135  | 0.00170  | 0.00114  | 0.00168  | 0.000915 | 0.00133  | 0.00364  | 0.00178  | 0.00570 | 0.00880 | 0.00350  | 0.00387  |
| <i>naphtho[2,3-b]fluoranthene</i>     | 0.00135  | 0.00170  | 0.00114  | 0.00168  | 0.000915 | 0.00133  | 0.00364  | 0.00178  | 0.00570 | 0.00880 | 0.00350  | 0.00387  |
| <i>dibenzo[a,e]fluoranthene</i>       | 0.000379 | 0.000478 | 0.000322 | 0.000472 | 0.000257 | 0.000373 | 0.00103  | 0.000500 | 0.00161 | 0.00248 | 0.000985 | 0.00109  |
| <i>dibenzo[a,l]pyrene</i>             | 0.000333 | 0.000419 | 0.000282 | 0.000414 | 0.000226 | 0.000327 | 0.000900 | 0.000438 | 0.00142 | 0.00217 | 0.000860 | 0.000955 |
| <i>naphtho[2,3-k]fluoranthene</i>     | 0.00135  | 0.00170  | 0.00114  | 0.00168  | 0.000915 | 0.00133  | 0.00364  | 0.00178  | 0.00570 | 0.00880 | 0.00350  | 0.00387  |
| <i>naphtho[2,3-e]pyrene</i>           | 0.00135  | 0.00170  | 0.00114  | 0.00168  | 0.000915 | 0.00133  | 0.00364  | 0.00178  | 0.00570 | 0.00880 | 0.00350  | 0.003865 |
| <i>dibenzo[a,e]pyrene</i>             | 0.00446  | 0.00560  | 0.00378  | 0.00555  | 0.00303  | 0.00439  | 0.0121   | 0.00590  | 0.0190  | 0.0291  | 0.01155  | 0.0128   |
| <i>coronene</i>                       | 0.000406 | 0.000510 | 0.000344 | 0.000505 | 0.000275 | 0.000400 | 0.00110  | 0.000535 | 0.00173 | 0.00265 | 0.00105  | 0.00117  |
| <i>dibenzo[e,l]pyrene</i>             | 0.00135  | 0.00170  | 0.00114  | 0.00168  | 0.000915 | 0.00133  | 0.00364  | 0.00178  | 0.00570 | 0.00880 | 0.00350  | 0.00387  |
| <i>naphtho[2,3-a]pyrene</i>           | 0.00135  | 0.00170  | 0.00114  | 0.00168  | 0.000915 | 0.00133  | 0.00364  | 0.00178  | 0.00570 | 0.00880 | 0.00350  | 0.00387  |
| <i>benzo[b]perylene</i>               | 0.00135  | 0.00170  | 0.00114  | 0.00168  | 0.000915 | 0.00133  | 0.00364  | 0.00178  | 0.00570 | 0.00880 | 0.00350  | 0.00387  |
| <i>dibenzo[a,i]pyrene</i>             | 0.000420 | 0.000530 | 0.000356 | 0.000520 | 0.000285 | 0.000413 | 0.00114  | 0.000550 | 0.00179 | 0.00274 | 0.00109  | 0.00121  |
| <i>dibenzo[a,h]pyrene</i>             | 0.00115  | 0.00145  | 0.000970 | 0.00143  | 0.000775 | 0.00113  | 0.00310  | 0.00151  | 0.00487 | 0.00750 | 0.00297  | 0.00329  |

## b) During wildfires outdoor

| Analyte                    | Carson, WA | St Helena, CA | Prineville, OR | Alturas, CA | Richland, WA | Sunriver, OR | Corvallis, OR 2 | Seattle, WA 2 | Lake Oswego, OR | McCall, ID | Newport, OR | Sandpoint, ID |
|----------------------------|------------|---------------|----------------|-------------|--------------|--------------|-----------------|---------------|-----------------|------------|-------------|---------------|
| <i>naphthalene</i>         | 24.2       | 22.9          | 37.5           | 63.0        | 80.9         | 26.2         | 257             | 175           | 15.4            | 53.1       | 47.2        | 42.7          |
| <i>2-methylnaphthalene</i> | 5.04       | 2.32          | 3.53           | 11.4        | 12.4         | 6.32         | 20.4            | 44.6          | 1.53            | 7.44       | 3.97        | 4.78          |
| <i>1-methylnaphthalene</i> | 4.23       | 1.93          | 3.25           | 5.27        | 7.15         | 4.69         | 13.2            | 25.6          | 1.68            | 3.97       | 1.65        | 2.63          |
| <i>2-ethylnaphthalene</i>  | 0.595      | 0.247         | 0.529          | 0.518       | 0.749        | 0.600        | 1.76            | 3.78          | 0.274           | 0.477      | 0.211       | 0.397         |

|                                       |         |          |          |          |           |          |          |         |           |           |           |          |
|---------------------------------------|---------|----------|----------|----------|-----------|----------|----------|---------|-----------|-----------|-----------|----------|
| <i>2,6-dimethylnaphthalene</i>        | 2.17    | 0.955    | 1.17     | 1.36     | 2.32      | 2.68     | 5.5      | 11.5    | 0.642     | 1.02      | 0.392     | 0.906    |
| <i>1,4-dimethylnaphthalene</i>        | 0.587   | 0.154    | 0.186    | 0.185    | 0.598     | 0.757    | 0.844    | 1.58    | 0.209     | 0.139     | 0.0440    | 0.0979   |
| <i>1,5-dimethylnaphthalene</i>        | 1.49    | 0.332    | 0.0446   | 0.390    | 0.486     | 1.69     | 1.19     | 2.38    | 0.465     | 0.263     | 0.128     | 0.268    |
| <i>1,2-dimethylnaphthalene</i>        | 1.19    | 0.4      | 0.355    | 0.316    | 0.492     | 1.60     | 1.12     | 2.16    | 0.512     | 0.205     | 0.102     | 0.359    |
| <i>acenaphthylene</i>                 | 0.146   | 0.0649   | 0.0615   | 0.0217   | 0.0929    | 0.108    | 0.0127   | 0.556   | 0.0284    | 0.0513    | 0.0238    | 0.0699   |
| <i>1,8-dimethylnaphthalene</i>        | 0.0246  | 0.0195   | 0.0436   | 0.0365   | 0.0316    | 0.0243   | 0.01735  | 0.0500  | 0.0176    | 0.0382    | 0.0401    | 0.0382   |
| <i>acenaphthene</i>                   | 5.79    | 2.50     | 3.70     | 3.34     | 4.64      | 7.32     | 127      | 68.1    | 1.64      | 5.87      | 0.0590    | 2.11     |
| <i>2,6-diethylnaphthalene</i>         | 0.00580 | 0.00400  | 0.00455  | 0.0037   | 0.00306   | 0.00384  | 0.00270  | 0.0110  | 0.00150   | 0.00385   | 0.00407   | 0.00565  |
| <i>fluorene</i>                       | 8.90    | 1.16     | 2.65     | 4.00     | 2.39      | 7.49     | 41.4     | 17.6    | 2.50      | 2.18      | 0.315     | 1.53     |
| <i>dibenzothiophene</i>               | 0.225   | 0.0615   | 0.0522   | 0.0858   | 0.0664    | 0.882    | 3.00     | 1.50    | 0.0111    | 0.0837    | 0.0102    | 0.0534   |
| <i>phenanthrene</i>                   | 33.4    | 3.10     | 2.31     | 13.1     | 3.60      | 15.0     | 67.1     | 33.3    | 1.77      | 2.27      | 4.04      | 3.13     |
| <i>anthracene</i>                     | 2.68    | 0.162    | 0.00276  | 0.383    | 0.136     | 0.534    | 1.77     | 1.16    | 0.000880  | 0.0677    | 0.0731    | 0.198    |
| <i>2-methylphenanthrene</i>           | 6.02    | 0.466    | 0.292    | 1.84     | 0.273     | 2.51     | 1.63     | 2.40    | 0.125     | 0.173     | 0.915     | 0.475    |
| <i>1-methylphenanthrene</i>           | 9.53    | 0.578    | 0.274    | 2.64     | 0.169     | 4.10     | 0.660    | 1.22    | 0.147     | 0.0671    | 0.987     | 0.646    |
| <i>2-methylanthracene</i>             | 0.594   | 0.00127  | 0.000525 | 0.000478 | 0.000207  | 0.00109  | 0.0570   | 0.00340 | 0.000115  | 0.000297  | 0.000244  | 0.00146  |
| <i>9-methylanthracene</i>             | 0.108   | 0.00215  | 0.000865 | 0.000790 | 0.000328  | 0.00184  | 0.00133  | 0.00575 | 0.000185  | 0.000478  | 0.000377  | 0.00246  |
| <i>3,6-dimethylphenanthrene</i>       | 0.180   | 0.0206   | 0.00995  | 0.0324   | 0.00721   | 0.0828   | 0.0380   | 0.134   | 0.000615  | 0.00828   | 0.0000930 | 0.00108  |
| <i>2,3-dimethylanthracene</i>         | 0.00117 | 0.000775 | 0.000269 | 0.000253 | 0.0000805 | 0.000655 | 0.000475 | 0.00207 | 0.0000499 | 0.000129  | 0.0000755 | 0.000870 |
| <i>fluoranthene</i>                   | 3.56    | 0.320    | 0.213    | 0.795    | 0.165     | 1.10     | 2.89     | 4.36    | 0.0312    | 0.250     | 0.138     | 0.280    |
| <i>9,10-dimethylanthracene</i>        | 0.00265 | 0.00177  | 0.000580 | 0.000550 | 0.000161  | 0.00149  | 0.00108  | 0.00470 | 0.000104  | 0.000264  | 0.000136  | 0.00197  |
| <i>pyrene</i>                         | 7.55    | 0.419    | 0.175    | 1.57     | 0.113     | 3.94     | 1.25     | 2.20    | 0.0552    | 0.0978    | 0.335     | 0.406    |
| <i>retene</i>                         | 44.0    | 2.03     | 0.571    | 9.76     | 0.171     | 28.1     | 0.355    | 1.10    | 0.346     | 0.0198    | 1.82      | 2.14     |
| <i>benzo[a]fluorene</i>               | 0.344   | 0.0193   | 0.00808  | 0.0432   | 0.00303   | 0.0784   | 0.0205   | 0.0502  | 0.00107   | 0.00301   | 0.00485   | 0.00373  |
| <i>benzo[b]fluorene</i>               | 0.138   | 0.0138   | 0.00475  | 0.0154   | 0.00180   | 0.0310   | 0.0131   | 0.0366  | 0.000120  | 0.000302  | 0.00199   | 0.00242  |
| <i>benzo[c]fluorene</i>               | 0.165   | 0.000605 | 0.00167  | 0.0160   | 0.000934  | 0.0363   | 0.00616  | 0.00863 | 0.000171  | 0.0000915 | 0.00194   | 0.000675 |
| <i>1-methylpyrene</i>                 | 0.218   | 0.0118   | 0.00591  | 0.0215   | 0.00216   | 0.0556   | 0.0120   | 0.0481  | 0.000730  | 0.00222   | 0.00203   | 0.0121   |
| <i>benz[a]anthracene</i>              | 0.395   | 0.00997  | 0.00454  | 0.0214   | 0.00249   | 0.115    | 0.0123   | 0.0499  | 0.001720  | 0.00167   | 0.00199   | 0.0162   |
| <i>cyclopenta[cd]pyrene</i>           | 0.137   | 0.000565 | 0.000175 | 0.000168 | 0.0000436 | 0.0371   | 0.0712   | 0.184   | 0.0000300 | 0.000075  | 0.0000323 | 0.00062  |
| <i>triphenylene</i>                   | 0.116   | 0.00840  | 0.00729  | 0.0198   | 0.00191   | 0.0426   | 0.00806  | 0.0337  | 0.00188   | 0.00188   | 0.00244   | 0.0111   |
| <i>chrysene</i>                       | 0.567   | 0.000675 | 0.00982  | 0.0582   | 0.00409   | 0.217    | 0.0134   | 0.0561  | 0.00638   | 0.00152   | 0.00704   | 0.0129   |
| <i>5-methylchrysene</i>               | 0.0380  | 0.00208  | 0.000645 | 0.00141  | 0.000161  | 0.0165   | 0.00126  | 0.0055  | 0.000111  | 0.000276  | 0.000120  | 0.002285 |
| <i>6-methylchrysene</i>               | 0.0354  | 0.00111  | 0.000344 | 0.00441  | 0.0000860 | 0.0157   | 0.000670 | 0.00293 | 0.000671  | 0.000147  | 0.0000635 | 0.00122  |
| <i>benzo[b]fluoranthene</i>           | 0.179   | 0.000367 | 0.00251  | 0.0100   | 0.000892  | 0.0751   | 0.00560  | 0.0328  | 0.00198   | 0.0000486 | 0.00127   | 0.000404 |
| <i>7,12-dimethylbenz[a]anthracene</i> | 0.0455  | 0.00121  | 0.000378 | 0.00157  | 0.0000950 | 0.0166   | 0.000735 | 0.00321 | 0.000245  | 0.000162  | 0.0000710 | 0.00134  |
| <i>benzo[k]fluoranthene</i>           | 0.066   | 0.000459 | 0.000142 | 0.00319  | 0.000326  | 0.0274   | 0.00208  | 0.0107  | 0.000553  | 0.0000606 | 0.000469  | 0.000505 |
| <i>benzo[j]fluoranthene</i>           | 0.122   | 0.000510 | 0.000622 | 0.00520  | 0.000306  | 0.0522   | 0.00154  | 0.0142  | 0.00113   | 0.0000675 | 0.000638  | 0.000560 |

|                                   |          |          |           |           |           |          |          |          |            |           |            |          |
|-----------------------------------|----------|----------|-----------|-----------|-----------|----------|----------|----------|------------|-----------|------------|----------|
| <i>benzo[e]pyrene</i>             | 0.108    | 0.000494 | 0.00101   | 0.00482   | 0.000433  | 0.0445   | 0.00282  | 0.0185   | 0.000819   | 0.0000650 | 0.000460   | 0.000545 |
| <i>benzo[a]pyrene</i>             | 0.145    | 0.000975 | 0.000303  | 0.00292   | 0.000309  | 0.0501   | 0.00285  | 0.0267   | 0.000474   | 0.000129  | 0.0000555  | 0.00108  |
| <i>perylene</i>                   | 0.0342   | 0.00109  | 0.000339  | 0.000326  | 0.0000840 | 0.000920 | 0.000665 | 0.00290  | 0.0000580  | 0.000145  | 0.0000620  | 0.00121  |
| <i>indeno[1,2,3-cd]pyrene</i>     | 0.0315   | 0.000169 | 0.000052  | 0.0000500 | 0.0000130 | 0.0221   | 0.00315  | 0.0191   | 0.000554   | 0.0000223 | 0.000365   | 0.000186 |
| <i>dibenzo[a,h]anthracene</i>     | 0.000915 | 0.000610 | 0.000189  | 0.000182  | 0.0000470 | 0.000510 | 0.000370 | 0.00162  | 0.0000323  | 0.0000805 | 0.0000346  | 0.000670 |
| <i>benzo[a]chrysene</i>           | 0.0476   | 0.000438 | 0.000136  | 0.000130  | 0.0000337 | 0.0258   | 0.000266 | 0.00116  | 0.0000232  | 0.0000580 | 0.0000248  | 0.000482 |
| <i>benzo[ghi]perylene</i>         | 0.0522   | 0.00141  | 0.000712  | 0.00166   | 0.000302  | 0.0208   | 0.00512  | 0.0218   | 0.000317   | 0.0000297 | 0.000193   | 0.000247 |
| <i>anthanthrene</i>               | 0.0121   | 0.000163 | 0.0000505 | 0.0000486 | 0.0000126 | 0.00502  | 0.00312  | 0.0161   | 0.0000865  | 0.0000216 | 0.0000925  | 0.000180 |
| <i>naphtho[1,2-b]fluoranthene</i> | 0.0129   | 0.000700 | 0.000218  | 0.000209  | 0.0000540 | 0.00573  | 0.000427 | 0.00186  | 0.0000373  | 0.0000930 | 0.0000398  | 0.000775 |
| <i>naphtho[2,3-b]fluoranthene</i> | 0.00106  | 0.000700 | 0.000218  | 0.000209  | 0.0000540 | 0.000590 | 0.000427 | 0.00186  | 0.0000373  | 0.0000930 | 0.0000398  | 0.000775 |
| <i>dibenzo[a,e]fluoranthene</i>   | 0.038    | 0.000198 | 0.0000610 | 0.0000590 | 0.0000152 | 0.000166 | 0.000120 | 0.000525 | 0.0000151  | 0.0000261 | 0.0000112  | 0.000218 |
| <i>dibenzo[a,l]pyrene</i>         | 0.000260 | 0.000173 | 0.0000535 | 0.0000515 | 0.0000134 | 0.000146 | 0.000105 | 0.000460 | 0.00000920 | 0.0000229 | 0.00000980 | 0.000191 |
| <i>naphtho[2,3-k]fluoranthene</i> | 0.0131   | 0.000700 | 0.000218  | 0.000209  | 0.0000540 | 0.00671  | 0.000427 | 0.00186  | 0.0000373  | 0.0000930 | 0.0000398  | 0.000775 |
| <i>naphtho[2,3-e]pyrene</i>       | 0.00106  | 0.000700 | 0.000218  | 0.000209  | 0.0000540 | 0.000590 | 0.000427 | 0.00186  | 0.0000373  | 0.0000930 | 0.0000398  | 0.000775 |
| <i>dibenzo[a,e]pyrene</i>         | 0.00899  | 0.00233  | 0.000720  | 0.000690  | 0.000179  | 0.00429  | 0.00141  | 0.00615  | 0.000123   | 0.000307  | 0.000132   | 0.00256  |
| <i>coronene</i>                   | 0.00657  | 0.000212 | 0.0000655 | 0.0000630 | 0.0000905 | 0.00248  | 0.00125  | 0.0043   | 0.000062   | 0.0000280 | 0.000012   | 0.000233 |
| <i>dibenzo[e,l]pyrene</i>         | 0.0460   | 0.000700 | 0.000218  | 0.000209  | 0.0000540 | 0.0215   | 0.000427 | 0.00186  | 0.0000373  | 0.0000930 | 0.0000398  | 0.000775 |
| <i>naphtho[2,3-a]pyrene</i>       | 0.00106  | 0.000700 | 0.000218  | 0.000209  | 0.0000540 | 0.000590 | 0.000427 | 0.00186  | 0.0000373  | 0.0000930 | 0.0000398  | 0.000775 |
| <i>benzo[b]perylene</i>           | 0.00106  | 0.000700 | 0.000218  | 0.000209  | 0.0000540 | 0.000590 | 0.000427 | 0.00186  | 0.0000373  | 0.0000930 | 0.0000398  | 0.000775 |
| <i>dibenzo[a,i]pyrene</i>         | 0.000328 | 0.000219 | 0.0000675 | 0.0000650 | 0.0000169 | 0.000184 | 0.000133 | 0.00058  | 0.0000116  | 0.0000289 | 0.0000124  | 0.000241 |
| <i>dibenzo[a,h]pyrene</i>         | 0.000895 | 0.000595 | 0.000185  | 0.000178  | 0.0000460 | 0.000500 | 0.000363 | 0.00158  | 0.0000317  | 0.0000790 | 0.0000398  | 0.000655 |



**Table S16.** PAH air concentrations (ng/m<sup>3</sup>) after wildfires. *Italicized values indicate 1/2 MDL.***a) After wildfires indoor**

| Analyte                  | Carson, WA | Sunriver, OR | Corvallis, OR 2 | Seattle, WA 2 | Richland, WA | Seattle, WA 1 | Cobb, CA | McCall, ID | Sandpoint, ID | Lake Oswego, OR | Prineville, OR | Corvallis, OR 1 |
|--------------------------|------------|--------------|-----------------|---------------|--------------|---------------|----------|------------|---------------|-----------------|----------------|-----------------|
| naphthalene              | 464        | 101          | 294             | 176           | 530          | 118           | 290      | 440        | 219           | 216             | 48.4           | 190             |
| 2-methylnaphthalene      | 190        | 36.0         | 29.8            | 43.4          | 248          | 43.7          | 66.2     | 141        | 135           | 111             | 14.8           | 62.6            |
| 1-methylnaphthalene      | 102        | 22.3         | 18.9            | 24.8          | 120          | 25.9          | 39.8     | 116        | 77.8          | 59.6            | 5.27           | 34.3            |
| 2-ethylnaphthalene       | 11.6       | 3.81         | 3.74            | 5.86          | 14.0         | 5.61          | 9.41     | 12.9       | 15.7          | 11.9            | 0.0353         | 3.82            |
| 2,6-dimethylnaphthalene  | 41.5       | 18.8         | 14.5            | 16.2          | 44.8         | 18.4          | 22.8     | 54.0       | 44.0          | 43.0            | 5.11           | 13.7            |
| 1,4-dimethylnaphthalene  | 4.72       | 4.36         | 3.10            | 3.16          | 6.16         | 4.98          | 6.95     | 15.0       | 5.33          | 5.64            | 1.62           | 1.53            |
| 1,5-dimethylnaphthalene  | 10.5       | 0.0305       | 0.0325          | 4.46          | 7.29         | 2.07          | 4.90     | 6.84       | 6.62          | 6.86            | 1.10           | 2.06            |
| 1,2-dimethylnaphthalene  | 5.07       | 6.04         | 6.65            | 3.75          | 11.6         | 5.54          | 9.58     | 10.6       | 9.98          | 10.2            | 2.01           | 4.20            |
| acenaphthylene           | 9.19       | 0.998        | 0.729           | 1.23          | 2.02         | 3.00          | 6.37     | 0.0338     | 0.0248        | 0.0328          | 1.29           | 0.0198          |
| 1,8-dimethylnaphthalene  | 0.0301     | 0.0296       | 0.0312          | 0.0332        | 0.0366       | 0.0461        | 0.0386   | 0.0275     | 0.0262        | 0.0358          | 0.0317         | 0.0330          |
| acenaphthene             | 22.2       | 38.4         | 15.1            | 12.4          | 36.4         | 20.8          | 20.9     | 21.6       | 161           | 0.0530          | 3.33           | 21.7            |
| 2,6-diethylnaphthalene   | 0.0112     | 0.00540      | 0.00670         | 0.0106        | 0.00372      | 0.00910       | 2.90     | 0.00910    | 0.00620       | 0.00825         | 0.0154         | 0.00347         |
| fluorene                 | 6.85       | 7.6          | 6.41            | 4.97          | 6.48         | 5.27          | 10.3     | 9.19       | 27.0          | 1.76            | 1.99           | 4.95            |
| dibenzothiophene         | 0.935      | 5.87         | 2.25            | 1.46          | 1.41         | 4.86          | 1.97     | 7.26       | 1.43          | 0.236           | 0.518          | 0.297           |
| phenanthrene             | 6.50       | 26.2         | 10.8            | 8.56          | 8.17         | 26.3          | 9.85     | 23.7       | 23.8          | 2.19            | 4.48           | 5.80            |
| anthracene               | 0.318      | 0.444        | 0.00640         | 0.229         | 0.00237      | 0.00840       | 0.723    | 0.00920    | 0.00600       | 0.00790         | 0.0161         | 0.00245         |
| 2-methylphenanthrene     | 0.837      | 9.98         | 1.86            | 1.12          | 2.09         | 14.1          | 1.05     | 10.8       | 2.04          | 0.635           | 0.714          | 0.301           |
| 1-methylphenanthrene     | 0.475      | 7.59         | 1.05            | 0.654         | 0.00101      | 0.00575       | 0.00740  | 0.00685    | 0.00433       | 0.00560         | 0.0124         | 0.00123         |
| 2-methylanthracene       | 0.00402    | 0.00161      | 0.00211         | 0.00367       | 1.29         | 11.8          | 0.608    | 9.00       | 1.02          | 0.343           | 0.376          | 0.138           |
| 9-methylanthracene       | 0.00685    | 0.00272      | 0.00358         | 0.00625       | 0.000810     | 0.00459       | 0.00590  | 0.00545    | 0.00344       | 0.00448         | 0.00980        | 0.000985        |
| 3,6-dimethylphenanthrene | 0.0635     | 0.364        | 0.108           | 0.0555        | 0.118        | 0.927         | 0.00264  | 0.584      | 0.148         | 0.0744          | 0.00444        | 0.0156          |
| 2,3-dimethylanthracene   | 0.00250    | 0.188        | 0.0440          | 0.00227       | 0.0512       | 0.565         | 0.00213  | 0.326      | 0.00125       | 0.00162         | 0.00360        | 0.000330        |
| fluoranthene             | 0.215      | 0.201        | 0.316           | 0.383         | 0.0796       | 0.636         | 0.301    | 0.462      | 0.769         | 0.0962          | 0.314          | 0.239           |
| 9,10-dimethylanthracene  | 0.00570    | 0.00221      | 0.00294         | 0.00515       | 0.000570     | 0.00373       | 0.00485  | 0.00453    | 0.00283       | 0.00368         | 0.00820        | 0.000730        |
| pyrene                   | 0.198      | 0.257        | 0.287           | 0.177         | 0.104        | 0.938         | 0.248    | 0.519      | 0.356         | 0.116           | 0.221          | 0.0860          |
| retene                   | 0.245      | 0.330        | 0.156           | 0.0748        | 0.0495       | 0.472         | 0.237    | 0.283      | 0.190         | 0.108           | 0.311          | 0.0547          |
| benzo[a]fluorene         | 0.0109     | 0.00421      | 0.00560         | 0.00985       | 0.00106      | 0.00710       | 0.00925  | 0.00860    | 0.00540       | 0.00700         | 0.0157         | 0.00138         |
| benzo[b]fluorene         | 0.00710    | 0.00274      | 0.00364         | 0.00645       | 0.000680     | 0.00462       | 0.00600  | 0.00560    | 0.00352       | 0.00456         | 0.0102         | 0.000890        |
| benzo[c]fluorene         | 0.00195    | 0.000760     | 0.00101         | 0.00178       | 0.000196     | 0.00128       | 0.00167  | 0.00155    | 0.0360        | 0.00126         | 0.00282        | 0.000252        |
| 1-methylpyrene           | 0.00204    | 0.000785     | 0.0169          | 0.00185       | 0.00929      | 0.0650        | 0.00173  | 0.00162    | 0.00101       | 0.00131         | 0.00294        | 0.000256        |
| benz[a]anthracene        | 0.00379    | 0.00147      | 0.00195         | 0.00344       | 0.000361     | 0.00247       | 0.00322  | 0.00301    | 0.00188       | 0.00244         | 0.00545        | 0.000473        |
| cyclopenta[cd]pyrene     | 0.00183    | 0.000705     | 0.000935        | 0.00166       | 0.000173     | 0.00119       | 0.00155  | 0.00145    | 0.000905      | 0.00117         | 0.00264        | 0.000227        |

|                                |          |          |          |          |           |          |          |          |          |          |          |           |
|--------------------------------|----------|----------|----------|----------|-----------|----------|----------|----------|----------|----------|----------|-----------|
| triphenylene                   | 0.00117  | 0.000451 | 0.000600 | 0.00106  | 0.0001123 | 0.000760 | 0.000990 | 0.000925 | 0.000580 | 0.000750 | 0.00169  | 0.000147  |
| chrysene                       | 0.00219  | 0.000845 | 0.00112  | 0.00198  | 0.000208  | 0.00142  | 0.00186  | 0.00174  | 0.00109  | 0.00144  | 0.00316  | 0.000273  |
| 5-methylchrysene               | 0.00670  | 0.00259  | 0.00345  | 0.00610  | 0.000640  | 0.00437  | 0.00570  | 0.00530  | 0.00333  | 0.00432  | 0.00970  | 0.000835  |
| 6-methylchrysene               | 0.00358  | 0.00138  | 0.00184  | 0.00325  | 0.000340  | 0.00233  | 0.00304  | 0.00284  | 0.00177  | 0.00230  | 0.00515  | 0.000446  |
| benzo[b]fluoranthene           | 0.00119  | 0.000458 | 0.000610 | 0.00108  | 0.000113  | 0.000770 | 0.00101  | 0.000940 | 0.000590 | 0.000760 | 0.00172  | 0.000148  |
| 7,12-dimethylbenz[a]anthracene | 0.00392  | 0.00151  | 0.00201  | 0.00356  | 0.000374  | 0.00255  | 0.00333  | 0.00311  | 0.00194  | 0.00252  | 0.00565  | 0.000489  |
| benzo[k]fluoranthene           | 0.00149  | 0.000575 | 0.000760 | 0.00135  | 0.000141  | 0.000965 | 0.00126  | 0.00118  | 0.000735 | 0.000955 | 0.00215  | 0.000185  |
| benzo[j]fluoranthene           | 0.00165  | 0.000635 | 0.000845 | 0.00150  | 0.000157  | 0.00108  | 0.00140  | 0.00131  | 0.000820 | 0.00106  | 0.00238  | 0.000206  |
| benzo[e]pyrene                 | 0.00160  | 0.000615 | 0.000820 | 0.00145  | 0.000152  | 0.00104  | 0.00136  | 0.00127  | 0.000790 | 0.00103  | 0.00231  | 0.000199  |
| benzo[a]pyrene                 | 0.00316  | 0.00122  | 0.00162  | 0.00287  | 0.000300  | 0.00206  | 0.00269  | 0.00251  | 0.00157  | 0.00203  | 0.00456  | 0.000394  |
| perylene                       | 0.00354  | 0.00137  | 0.00182  | 0.00321  | 0.000336  | 0.00230  | 0.00301  | 0.00281  | 0.00175  | 0.00227  | 0.00510  | 0.000440  |
| indeno[1,2,3-cd]pyrene         | 0.000545 | 0.000211 | 0.000280 | 0.000495 | 0.0000515 | 0.000355 | 0.000464 | 0.000433 | 0.000271 | 0.000351 | 0.000790 | 0.0000680 |
| dibenzo[a,h]anthracene         | 0.00197  | 0.000760 | 0.00101  | 0.00179  | 0.000187  | 0.00128  | 0.00168  | 0.00157  | 0.000975 | 0.00127  | 0.00285  | 0.000246  |
| benzo[a]chrysene               | 0.00142  | 0.000545 | 0.000725 | 0.00129  | 0.000134  | 0.000920 | 0.00120  | 0.00113  | 0.000700 | 0.000910 | 0.00205  | 0.000176  |
| benzo[ghi]perylene             | 0.000725 | 0.000280 | 0.000373 | 0.000660 | 0.0000690 | 0.000472 | 0.000615 | 0.000575 | 0.000360 | 0.000467 | 0.00105  | 0.0000905 |
| anthanthrene                   | 0.000530 | 0.000204 | 0.000271 | 0.000480 | 0.0000500 | 0.000344 | 0.000449 | 0.00042  | 0.000262 | 0.000340 | 0.000760 | 0.0000655 |
| naphtho[1,2-b]fluoranthene     | 0.00227  | 0.000875 | 0.00117  | 0.00206  | 0.000216  | 0.00148  | 0.00193  | 0.00181  | 0.00113  | 0.00146  | 0.00328  | 0.000283  |
| naphtho[2,3-b]fluoranthene     | 0.00227  | 0.000875 | 0.00117  | 0.00206  | 0.000216  | 0.00148  | 0.00193  | 0.00181  | 0.00113  | 0.00146  | 0.00328  | 0.000283  |
| dibenzo[a,e]fluoranthene       | 0.000640 | 0.000247 | 0.000328 | 0.000580 | 0.0000605 | 0.000416 | 0.000540 | 0.000505 | 0.000317 | 0.000411 | 0.000920 | 0.0000795 |
| dibenzo[a,l]pyrene             | 0.000560 | 0.000217 | 0.000288 | 0.000510 | 0.0000530 | 0.000365 | 0.000476 | 0.000445 | 0.000278 | 0.000360 | 0.000810 | 0.0000695 |
| naphtho[2,3-k]fluoranthene     | 0.00227  | 0.000875 | 0.00117  | 0.00206  | 0.000216  | 0.00148  | 0.00193  | 0.00181  | 0.00113  | 0.00146  | 0.00328  | 0.000283  |
| naphtho[2,3-e]pyrene           | 0.00227  | 0.000875 | 0.00117  | 0.00206  | 0.000216  | 0.00148  | 0.00193  | 0.00181  | 0.00113  | 0.00146  | 0.00328  | 0.000283  |
| dibenzo[a,e]pyrene             | 0.00750  | 0.00290  | 0.00386  | 0.00680  | 0.000715  | 0.00490  | 0.00640  | 0.00595  | 0.00373  | 0.00484  | 0.0109   | 0.000935  |
| coronene                       | 0.000685 | 0.000264 | 0.000351 | 0.000620 | 0.0000650 | 0.000445 | 0.000580 | 0.000545 | 0.000339 | 0.000440 | 0.000990 | 0.0000850 |
| dibenzo[e,l]pyrene             | 0.00227  | 0.000875 | 0.00117  | 0.00206  | 0.000216  | 0.001480 | 0.00193  | 0.00181  | 0.00113  | 0.00146  | 0.00328  | 0.000283  |
| naphtho[2,3-a]pyrene           | 0.00227  | 0.000875 | 0.00117  | 0.00206  | 0.000216  | 0.001480 | 0.00193  | 0.00181  | 0.00113  | 0.00146  | 0.00328  | 0.000283  |
| benzo[b]perylene               | 0.00227  | 0.000875 | 0.00117  | 0.00206  | 0.000216  | 0.001480 | 0.00193  | 0.00181  | 0.00113  | 0.00146  | 0.00328  | 0.000283  |
| dibenzo[a,i]pyrene             | 0.000705 | 0.000273 | 0.000363 | 0.000640 | 0.0000670 | 0.000460 | 0.000600 | 0.000560 | 0.000351 | 0.000455 | 0.00102  | 0.0000880 |
| dibenzo[a,h]pyrene             | 0.00193  | 0.000745 | 0.000990 | 0.00175  | 0.000183  | 0.00126  | 0.00164  | 0.00154  | 0.000955 | 0.00124  | 0.00279  | 0.000241  |

**b) After wildfires outdoor**

| Analyte             | Carson, WA | Sunriver, OR | Corvallis, OR 2 | Seattle, WA 2 | Richland, WA | Seattle, WA 1 | Cobb, CA | McCall, ID | Sandpoint, ID | Lake Oswego, OR | Prineville, OR | Corvallis, OR 1 |
|---------------------|------------|--------------|-----------------|---------------|--------------|---------------|----------|------------|---------------|-----------------|----------------|-----------------|
| naphthalene         | 36.6       | 15.2         | 41.8            | 33.0          | 82.8         | 64.5          | 51.0     | 22.1       | 116           | 49.3            | 9.88           | 60.0            |
| 2-methylnaphthalene | 8.68       | 2.88         | 9.46            | 10.1          | 21.6         | 12.1          | 6.61     | 2.10       | 52.6          | 10.8            | 0.447          | 20.1            |
| 1-methylnaphthalene | 6.19       | 2.43         | 8.02            | 7.13          | 8.45         | 7.19          | 2.62     | 0.969      | 27.8          | 6.25            | 0.164          | 12.8            |

|                                |           |          |          |          |           |           |          |          |           |           |            |           |
|--------------------------------|-----------|----------|----------|----------|-----------|-----------|----------|----------|-----------|-----------|------------|-----------|
| 2-ethylnaphthalene             | 0.590     | 0.261    | 0.711    | 0.976    | 1.03      | 1.19      | 0.0279   | 0.251    | 3.44      | 1.09      | 0.0145     | 1.21      |
| 2,6-dimethylnaphthalene        | 1.66      | 0.640    | 2.58     | 2.98     | 3.24      | 3.15      | 0.903    | 0.355    | 9.23      | 3.24      | 0.121      | 3.68      |
| 1,4-dimethylnaphthalene        | 0.255     | 0.104    | 0.439    | 0.634    | 2.70      | 0.661     | 0.176    | 0.0808   | 0.992     | 0.413     | 0.0153     | 0.434     |
| 1,5-dimethylnaphthalene        | 0.458     | 0.217    | 0.831    | 0.707    | 0.412     | 0.441     | 0.147    | 0.0732   | 1.22      | 0.544     | 0.0143     | 0.674     |
| 1,2-dimethylnaphthalene        | 0.363     | 0.200    | 0.516    | 0.638    | 0.966     | 0.842     | 0.0274   | 0.144    | 1.85      | 0.866     | 0.106      | 1.14      |
| acenaphthylene                 | 0.444     | 0.193    | 0.476    | 0.328    | 0.0174    | 0.0165    | 0.0168   | 0.00890  | 0.359     | 0.0125    | 0.00855    | 0.0113    |
| 1,8-dimethylnaphthalene        | 0.0142    | 0.00760  | 0.0131   | 0.0127   | 0.0291    | 0.0275    | 0.0278   | 0.0140   | 0.0146    | 0.0206    | 0.0140     | 0.0186    |
| acenaphthene                   | 2.59      | 1.42     | 2.69     | 8.01     | 0.0432    | 3.97      | 0.0414   | 0.0210   | 40.4      | 6.60      | 0.0210     | 0.0278    |
| 2,6-diethylnaphthalene         | 0.00119   | 0.00160  | 0.00204  | 0.00301  | 0.00276   | 0.00260   | 0.0456   | 0.00154  | 0.00120   | 0.00187   | 0.0210     | 0.00167   |
| fluorene                       | 1.60      | 0.529    | 1.08     | 2.26     | 0.427     | 1.33      | 0.362    | 0.172    | 8.34      | 1.47      | 0.133      | 1.78      |
| dibenzothiophene               | 0.0272    | 0.0166   | 0.0546   | 0.18     | 0.0208    | 0.0342    | 0.0332   | 0.0172   | 0.157     | 0.0406    | 0.00364    | 0.0331    |
| phenanthrene                   | 2.09      | 1.43     | 1.98     | 5.14     | 0.646     | 1.09      | 0.622    | 0.321    | 6.44      | 0.896     | 0.161      | 1.60      |
| anthracene                     | 0.181     | 0.117    | 0.178    | 0.222    | 0.00160   | 0.00148   | 0.0639   | 0.00129  | 0.000720  | 0.00122   | 0.000675   | 0.00112   |
| 2-methylphenanthrene           | 0.149     | 0.159    | 0.207    | 0.515    | 0.0480    | 0.0780    | 0.0981   | 0.0550   | 0.163     | 0.0727    | 0.0120     | 0.455     |
| 1-methylphenanthrene           | 0.136     | 0.212    | 0.179    | 0.318    | 0.000447  | 0.000339  | 0.000895 | 0.000780 | 0.000213  | 0.000515  | 0.000135   | 0.000498  |
| 2-methylanthracene             | 0.0141    | 0.0122   | 0.0193   | 0.0283   | 0.0248    | 0.0359    | 0.0621   | 0.0457   | 0.0690    | 0.0414    | 0.0133     | 0.213     |
| 9-methylanthracene             | 0.000250  | 0.000910 | 0.00103  | 0.00173  | 0.000365  | 0.000279  | 0.000720 | 0.000625 | 0.000173  | 0.000416  | 0.000111   | 0.000400  |
| 3,6-dimethylphenanthrene       | 0.00436   | 0.000408 | 0.00906  | 0.0358   | 0.00378   | 0.00374   | 0.000294 | 0.000270 | 0.00466   | 0.00565   | 0.0000314  | 0.0412    |
| 2,3-dimethylanthracene         | 0.0000795 | 0.000330 | 0.000371 | 0.000625 | 0.000101  | 0.0000685 | 0.000238 | 0.000219 | 0.0000497 | 0.000134  | 0.0000254  | 0.000130  |
| fluoranthene                   | 0.144     | 0.144    | 0.200    | 0.618    | 0.0362    | 0.0317    | 0.0574   | 0.0370   | 0.207     | 0.0754    | 0.00301    | 0.09530   |
| 9,10-dimethylanthracene        | 0.000175  | 0.000750 | 0.000840 | 0.00143  | 0.000212  | 0.000138  | 0.000525 | 0.000493 | 0.000106  | 0.000295  | 0.0000505  | 0.000288  |
| pyrene                         | 0.111     | 0.138    | 0.139    | 0.349    | 0.0316    | 0.0240    | 0.0501   | 0.0272   | 0.0894    | 0.0509    | 0.00162    | 0.0911    |
| retene                         | 0.218     | 0.471    | 0.282    | 0.284    | 0.00978   | 0.0175    | 0.0743   | 0.0500   | 0.0403    | 0.0229    | 0.0155     | 0.0603    |
| benzo[a]fluorene               | 0.00659   | 0.00778  | 0.00160  | 0.0198   | 0.000386  | 0.000246  | 0.000990 | 0.000935 | 0.00189   | 0.000550  | 0.0000890  | 0.00603   |
| benzo[b]fluorene               | 0.00298   | 0.00642  | 0.00104  | 0.0125   | 0.000245  | 0.000154  | 0.000640 | 0.000605 | 0.000125  | 0.000355  | 0.0000555  | 0.000349  |
| benzo[c]fluorene               | 0.0000600 | 0.000258 | 0.000289 | 0.000490 | 0.0000730 | 0.0000475 | 0.000181 | 0.000169 | 0.0000364 | 0.000101  | 0.0000173  | 0.0000985 |
| 1-methylpyrene                 | 0.00424   | 0.00654  | 0.00790  | 0.0164   | 0.00153   | 0.0000441 | 0.000184 | 0.000175 | 0.00117   | 0.00142   | 0.0000159  | 0.00451   |
| benz[a]anthracene              | 0.00542   | 0.0178   | 0.0131   | 0.0202   | 0.000128  | 0.0000790 | 0.000339 | 0.000324 | 0.0000655 | 0.000188  | 0.0000285  | 0.000185  |
| cyclopenta[cd]pyrene           | 0.00226   | 0.0122   | 0.0117   | 0.0272   | 0.0000610 | 0.0000377 | 0.000163 | 0.000156 | 0.0000314 | 0.0000905 | 0.0000136  | 0.0000890 |
| triphenylene                   | 0.00167   | 0.00493  | 0.00658  | 0.00880  | 0.0000402 | 0.0000252 | 0.000105 | 0.000100 | 0.0000205 | 0.0000585 | 0.00000905 | 0.0000575 |
| chrysene                       | 0.00643   | 0.0142   | 0.00999  | 0.0193   | 0.0000735 | 0.0000456 | 0.000195 | 0.000187 | 0.0000378 | 0.000109  | 0.0000164  | 0.000107  |
| 5-methylchrysene               | 0.000198  | 0.000885 | 0.000985 | 0.00168  | 0.000225  | 0.000139  | 0.000600 | 0.000575 | 0.000116  | 0.000333  | 0.0000500  | 0.000327  |
| 6-methylchrysene               | 0.000105  | 0.000472 | 0.000525 | 0.000895 | 0.000120  | 0.0000740 | 0.000319 | 0.000306 | 0.0000615 | 0.000177  | 0.0000267  | 0.000174  |
| benzo[b]fluoranthene           | 0.00129   | 0.00824  | 0.00659  | 0.0148   | 0.0000397 | 0.0000245 | 0.000106 | 0.000102 | 0.0000204 | 0.0000590 | 0.00000880 | 0.0000580 |
| 7,12-dimethylbenz[a]anthracene | 0.000116  | 0.000515 | 0.000575 | 0.000980 | 0.000132  | 0.0000820 | 0.000350 | 0.000335 | 0.0000675 | 0.000195  | 0.0000294  | 0.000191  |
| benzo[k]fluoranthene           | 0.0000437 | 0.00369  | 0.000219 | 0.000372 | 0.0000496 | 0.0000306 | 0.000133 | 0.000127 | 0.0000256 | 0.0000735 | 0.0000110  | 0.0000720 |

|                                   |           |           |           |          |           |           |           |           |            |           |            |           |
|-----------------------------------|-----------|-----------|-----------|----------|-----------|-----------|-----------|-----------|------------|-----------|------------|-----------|
| <i>benzo[j]fluoranthene</i>       | 0.000691  | 0.00560   | 0.00316   | 0.00722  | 0.0000550 | 0.0000340 | 0.000147  | 0.000141  | 0.0000284  | 0.0000815 | 0.0000123  | 0.0000800 |
| <i>benzo[e]pyrene</i>             | 0.000524  | 0.00367   | 0.00325   | 0.00734  | 0.0000530 | 0.0000329 | 0.000143  | 0.000137  | 0.0000275  | 0.0000790 | 0.0000119  | 0.0000775 |
| <i>benzo[a]pyrene</i>             | 0.000638  | 0.00735   | 0.00426   | 0.0106   | 0.000106  | 0.0000650 | 0.000282  | 0.00027   | 0.0000545  | 0.000157  | 0.0000235  | 0.000154  |
| <i>perylene</i>                   | 0.000104  | 0.000467  | 0.000520  | 0.000885 | 0.000118  | 0.0000730 | 0.000315  | 0.000302  | 0.0000610  | 0.000175  | 0.0000262  | 0.000172  |
| <i>indeno[1,2,3-cd]pyrene</i>     | 0.0000161 | 0.0000720 | 0.0000800 | 0.000137 | 0.0000182 | 0.0000112 | 0.0000486 | 0.0000466 | 0.00000940 | 0.0000270 | 0.00000404 | 0.0000266 |
| <i>dibenzo[a,h]anthracene</i>     | 0.0000580 | 0.000260  | 0.000290  | 0.000494 | 0.0000655 | 0.0000406 | 0.000176  | 0.000169  | 0.0000339  | 0.0000975 | 0.0000146  | 0.0000960 |
| <i>benzo[a]chrysene</i>           | 0.0000416 | 0.000187  | 0.000208  | 0.000355 | 0.0000472 | 0.0000291 | 0.000126  | 0.000121  | 0.0000243  | 0.0000700 | 0.0000105  | 0.0000690 |
| <i>benzo[ghi]perylene</i>         | 0.0000214 | 0.00308   | 0.000107  | 0.00796  | 0.0000242 | 0.0000150 | 0.0000645 | 0.0000620 | 0.0000123  | 0.0000359 | 0.00000540 | 0.0000353 |
| <i>anthanthrene</i>               | 0.0000155 | 0.0000695 | 0.0000775 | 0.000133 | 0.0000176 | 0.0000109 | 0.0000471 | 0.0000452 | 0.00000910 | 0.0000262 | 0.00000391 | 0.0000257 |
| <i>naphtho[1,2-b]fluoranthene</i> | 0.0000670 | 0.000300  | 0.000334  | 0.000570 | 0.0000755 | 0.0000468 | 0.000203  | 0.000194  | 0.0000391  | 0.000113  | 0.0000168  | 0.000111  |
| <i>naphtho[2,3-b]fluoranthene</i> | 0.0000670 | 0.000300  | 0.000334  | 0.000570 | 0.0000755 | 0.0000468 | 0.000203  | 0.000194  | 0.0000391  | 0.000113  | 0.0000168  | 0.000111  |
| <i>dibenzo[a,e]fluoranthene</i>   | 0.0000188 | 0.0000845 | 0.0000940 | 0.000160 | 0.0000213 | 0.0000132 | 0.0000570 | 0.0000545 | 0.0000110  | 0.0000317 | 0.00000474 | 0.0000311 |
| <i>dibenzo[a,l]pyrene</i>         | 0.0000165 | 0.0000740 | 0.0000825 | 0.000141 | 0.0000187 | 0.0000116 | 0.0000500 | 0.0000479 | 0.00000965 | 0.0000278 | 0.00000415 | 0.0000273 |
| <i>naphtho[2,3-k]fluoranthene</i> | 0.0000670 | 0.000300  | 0.000334  | 0.000570 | 0.0000755 | 0.0000468 | 0.000203  | 0.000194  | 0.0000391  | 0.000113  | 0.0000168  | 0.000111  |
| <i>naphtho[2,3-e]pyrene</i>       | 0.000067  | 0.000300  | 0.000334  | 0.000570 | 0.0000755 | 0.0000468 | 0.000203  | 0.000194  | 0.0000391  | 0.000113  | 0.0000168  | 0.000111  |
| <i>dibenzo[a,e]pyrene</i>         | 0.000221  | 0.000990  | 0.001105  | 0.001885 | 0.0002505 | 0.000155  | 0.000670  | 0.000640  | 0.000129   | 0.000372  | 0.0000555  | 0.000366  |
| <i>coronene</i>                   | 0.0000201 | 0.0000905 | 0.0001001 | 0.000172 | 0.0000228 | 0.0000141 | 0.0000610 | 0.0000585 | 0.0000118  | 0.0000339 | 0.00000505 | 0.0000333 |
| <i>dibenzo[e,l]pyrene</i>         | 0.0000670 | 0.000300  | 0.000334  | 0.000570 | 0.0000755 | 0.0000468 | 0.000203  | 0.000194  | 0.0000391  | 0.000113  | 0.0000168  | 0.000111  |
| <i>naphtho[2,3-a]pyrene</i>       | 0.0000670 | 0.000300  | 0.000334  | 0.000570 | 0.0000755 | 0.0000468 | 0.000203  | 0.000194  | 0.0000391  | 0.000113  | 0.0000168  | 0.000111  |
| <i>benzo[b]perylene</i>           | 0.0000670 | 0.000300  | 0.000334  | 0.000570 | 0.0000755 | 0.0000468 | 0.000203  | 0.000194  | 0.0000391  | 0.000113  | 0.0000168  | 0.000111  |
| <i>dibenzo[a,i]pyrene</i>         | 0.0000208 | 0.0000935 | 0.000104  | 0.000177 | 0.0000236 | 0.0000146 | 0.0000630 | 0.0000605 | 0.0000122  | 0.0000350 | 0.00000525 | 0.0000344 |
| <i>dibenzo[a,h]pyrene</i>         | 0.0000570 | 0.000255  | 0.000284  | 0.000484 | 0.0000645 | 0.0000398 | 0.000172  | 0.000165  | 0.0000332  | 0.0000955 | 0.0000143  | 0.0000940 |

**Table S17.** Relative standard deviation of replicate analysis in Newport, OR ( $\%RSD = \frac{\text{Standard deviation}}{\text{Average}} \cdot 100$ ).

| Analyte                 | Newport, OR<br>Outdoor 1 (ng/m <sup>3</sup> ) | Newport, OR<br>Outdoor 2 (ng/m <sup>3</sup> ) | Newport, OR<br>Outdoor 3 (ng/m <sup>3</sup> ) | %RSD  |
|-------------------------|-----------------------------------------------|-----------------------------------------------|-----------------------------------------------|-------|
| naphthalene             | 65.7                                          | 71.1                                          | 65.2                                          | 6.16  |
| 2-methylnaphthalene     | 8.01                                          | 8.67                                          | 8.36                                          | 2.56  |
| 1-methylnaphthalene     | 5.93                                          | 6.60                                          | 6.35                                          | 2.79  |
| 2-ethylnaphthalene      | 0.657                                         | 0.635                                         | 0.598                                         | 4.24  |
| 2,6-dimethylnaphthalene | 1.39                                          | 1.35                                          | 1.38                                          | 1.39  |
| 1,4-dimethylnaphthalene | 0.287                                         | 0.248                                         | 0.263                                         | 3.95  |
| 1,5-dimethylnaphthalene | 0.307                                         | 0.320                                         | 0.355                                         | 7.64  |
| acenaphthylene          | 0.642                                         | 0.721                                         | 0.670                                         | 5.37  |
| acenaphthene            | 2.29                                          | 2.30                                          | 2.29                                          | 0.157 |
| fluorene                | 0.641                                         | 0.708                                         | 0.743                                         | 3.60  |
| dibenzothiophene        | 0.0285                                        | 0.0455                                        | 0.0174                                        | 65.3  |
| phenanthrene            | 0.921                                         | 1.49                                          | 0.760                                         | 49.0  |
| anthracene              | 0.0779                                        | 0.124                                         | 0.0601                                        | 51.8  |
| 2-methylphenanthrene    | 0.107                                         | 0.196                                         | 0.059                                         | 80.0  |
| 2-methylanthracene      | 0.0659                                        | 0.123                                         | 0.0324                                        | 87.0  |
| fluoranthene            | 0.111                                         | 0.215                                         | 0.0465                                        | 96.0  |
| 9,10-dimethylanthracene | 0.00111                                       | 0.00183                                       | 0.000314                                      | 98.9  |
| pyrene                  | 0.0988                                        | 0.193                                         | 0.0407                                        | 97.2  |
| retene                  | 0.0649                                        | 0.127                                         | 0.0240                                        | 101   |
| benzo(a)fluorene        | 0.00658                                       | 0.0113                                        | 0.00223                                       | 95.7  |
| benzo(b)fluorene        | 0.00439                                       | 0.00828                                       | 0.00138                                       | 104   |
| benzo(c)fluorene        | 0.000381                                      | 0.000629                                      | 0.000495                                      | 18.8  |

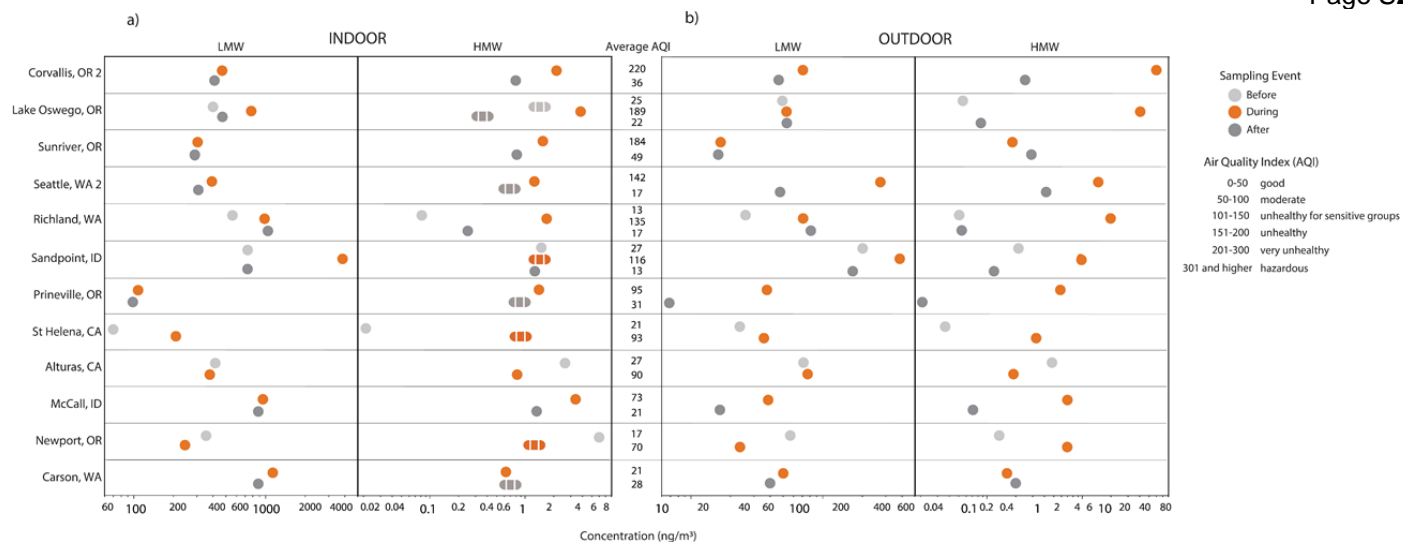

**Figure S3.** Vapor-phase PAH concentrations before, during and after wildfire summed by light molecular weight (LMW) and heavy molecular-weight (HMW) for a) indoor air and b) outdoor air. LMW PAHs are defined as having 2- to 3-rings, while HMW PAHs are defined as having four or more rings. Locations are ordered by increasing average AQI during wildfires. Dashed markers represent the concentration interval when non-detected compounds = 0 and non-detected compounds = one half of the detection limit.

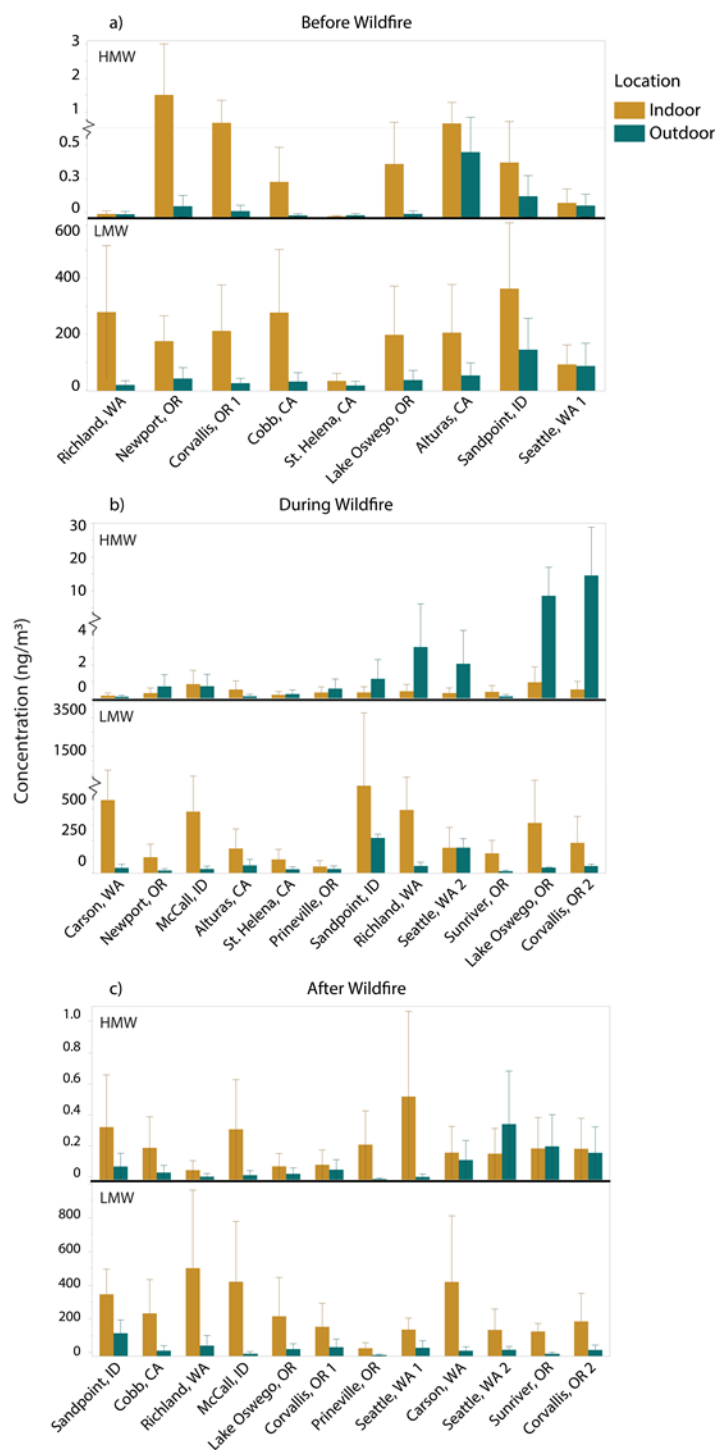

**Figure S4.** Indoor and outdoor vapor-phase PAH concentrations (note change in y-axis between figures) a) before b) during (ordered by increasing AQI) and c) after wildfires. PAHs are summed and grouped by LMW and HMW.

**Table S18.** Inhalation PAH excess lifetime cancer risk estimations for indoor and outdoor vapor-phase PAH air concentrations before, during and after wildfires. Values in bold indicate the higher risk for a particular site.

|         |  |                 | <b>Wildfire</b>    |                 |                       |                    |
|---------|--|-----------------|--------------------|-----------------|-----------------------|--------------------|
|         |  | <b>Location</b> | <b>No wildfire</b> | <b>Wildfire</b> | <b>After wildfire</b> | <b>Average AQI</b> |
| Indoor  |  | Carson, WA      | N/A                | <b>3.7E-07</b>  | 2.9E-07               | 21                 |
|         |  | Newport, OR     | <b>1.1E-06</b>     | 2.0E-07         | N/A                   | 70                 |
|         |  | McCall, ID      | N/A                | <b>5.4E-07</b>  | 3.5E-07               | 73                 |
|         |  | Alturas, CA     | <b>7.8E-07</b>     | 4.6E-07         | N/A                   | 90                 |
|         |  | St Helena, CA   | 3.7E-08            | <b>4.3E-07</b>  | N/A                   | 93                 |
|         |  | Prineville, OR  | N/A                | 7.7E-08         | <b>1.2E-07</b>        | 95                 |
|         |  | Sandpoint, ID   | 4.0E-07            | <b>1.6E-06</b>  | 3.3E-07               | 116                |
|         |  | Richland, WA    | 1.6E-07            | <b>4.1E-07</b>  | 2.8E-07               | 135                |
|         |  | Seattle, WA 2   | N/A                | <b>3.1E-07</b>  | 2.0E-07               | 142                |
|         |  | Sunriver, OR    | N/A                | <b>1.4E-07</b>  | 1.1E-07               | 184                |
|         |  | Lake Oswego, OR | 3.1E-07            | <b>4.9E-07</b>  | 1.5E-07               | 189                |
|         |  | Corvallis, OR 2 | N/A                | <b>4.1E-07</b>  | 2.5E-07               | 220                |
| Outdoor |  | Carson, WA      | N/A                | <b>1.4E-08</b>  | 1.0E-08               | 21                 |
|         |  | Newport, OR     | 9.3E-09            | <b>1.6E-08</b>  | N/A                   | 70                 |
|         |  | McCall, ID      | N/A                | <b>5.4E-07</b>  | 3.1E-09               | 73                 |
|         |  | Alturas, CA     | <b>5.9E-08</b>     | 1.4E-08         | N/A                   | 90                 |
|         |  | St Helena, CA   | 3.2E-09            | <b>1.3E-08</b>  | N/A                   | 93                 |
|         |  | Prineville, OR  | N/A                | <b>1.1E-08</b>  | 8.4E-10               | 95                 |
|         |  | Sandpoint, ID   | 2.5E-08            | <b>1.5E-07</b>  | 1.7E-08               | 116                |
|         |  | Richland, WA    | 4.9E-09            | <b>7.6E-08</b>  | 9.8E-09               | 135                |
|         |  | Seattle, WA 2   | N/A                | <b>2.4E-07</b>  | 4.8E-08               | 142                |
|         |  | Sunriver, OR    | N/A                | 8.6E-09         | <b>2.8E-08</b>        | 184                |
|         |  | Lake Oswego, OR | 8.1E-09            | <b>4.5E-07</b>  | 1.0E-08               | 189                |
|         |  | Corvallis, OR 2 | N/A                | <b>1.2E-06</b>  | 2.9E-08               | 220                |



**Table S19.** Inhalation PAH hazard quotient estimations for indoor and outdoor vapor-phase PAH air concentrations before, during and after wildfires. Values in bold indicate the higher risk for a particular site.

|         | Location        | No wildfire    | Wildfire       | After wildfire | Wildfire<br>Average AQI |
|---------|-----------------|----------------|----------------|----------------|-------------------------|
| Indoor  | Carson, WA      | N/A            | <b>4.2E-03</b> | 3.1E-03        | 21                      |
|         | Newport, OR     | <b>9.6E-04</b> | 8.2E-04        | N/A            | 70                      |
|         | McCall, ID      | N/A            | <b>2.9E-03</b> | 2.8E-03        | 73                      |
|         | Alturas, CA     | <b>1.5E-03</b> | 1.4E-03        | N/A            | 90                      |
|         | St Helena, CA   | 2.4E-04        | <b>6.8E-04</b> | N/A            | 93                      |
|         | Prineville, OR  | N/A            | <b>4.0E-04</b> | 3.0E-04        | 95                      |
|         | Sandpoint, ID   | 2.4E-03        | <b>1.5E-02</b> | 1.7E-03        | 116                     |
|         | Richland, WA    | 2.0E-03        | 3.6E-03        | <b>3.7E-03</b> | 135                     |
|         | Seattle, WA 2   | N/A            | <b>1.5E-03</b> | 1.0E-03        | 142                     |
|         | Sunriver, OR    | N/A            | <b>8.9E-04</b> | 4.8E-04        | 184                     |
|         | Lake Oswego, OR | 1.4E-03        | <b>2.7E-03</b> | 1.6E-03        | 189                     |
|         | Corvallis, OR 2 | N/A            | <b>2.0E-03</b> | 1.5E-03        | 220                     |
| Outdoor | Carson, WA      | N/A            | <b>4.1E-05</b> | 3.2E-05        | 21                      |
|         | Newport, OR     | <b>5.0E-05</b> | 1.7E-05        | N/A            | 70                      |
|         | McCall, ID      | N/A            | <b>3.2E-05</b> | 1.6E-05        | 73                      |
|         | Alturas, CA     | 5.9E-05        | <b>6.4E-05</b> | N/A            | 90                      |
|         | St Helena, CA   | 2.1E-05        | <b>2.8E-05</b> | N/A            | 93                      |
|         | Prineville, OR  | N/A            | <b>3.5E-05</b> | 6.7E-06        | 95                      |
|         | Sandpoint, ID   | 1.6E-04        | 1.9E-04        | <b>1.7E-03</b> | 116                     |
|         | Richland, WA    | 2.1E-05        | 5.3E-05        | <b>7.0E-05</b> | 135                     |
|         | Seattle, WA 2   | N/A            | <b>2.7E-05</b> | 1.1E-05        | 142                     |
|         | Sunriver, OR    | N/A            | 4.8E-07        | <b>7.4E-06</b> | 184                     |
|         | Lake Oswego, OR | 1.28E-07       | <b>5.1E-05</b> | 1.8E-07        | 189                     |
|         | Corvallis, OR 2 | N/A            | <b>1.7E-04</b> | 4.0E-05        | 220                     |

## References

1. Huckins, J. N. P., J. D.; Booij, K., *Monitors of the organic chemicals in the environment*. Springer: New York, NY, 2006; p 223.
2. Lohmann, R., Critical Review of Low-Density Polyethylene's Partitioning and Diffusion Coefficients for Trace Organic Contaminants and Implications for Its Use As a Passive Sampler. *Environmental Science & Technology* **2012**, *46* (2), 606-618.
3. Khairy, M. A.; Lohmann, R., Field Validation of Polyethylene Passive Air Samplers for Parent and Alkylated PAHs in Alexandria, Egypt. *Environmental Science & Technology* **2012**, *46* (7), 3990-3998.
4. Donald, C. E.; Anderson, K. A., Assessing soil-air partitioning of PAHs and PCBs with a new fugacity passive sampler. *Science of The Total Environment* **2017**, *596-597*, 293-302.
5. Minick, D. J.; Anderson, K. A., Diffusive flux of PAHs across sediment–water and water–air interfaces at urban superfund sites. *Environ. Toxicol. and Chem.* **2017**, *36* (9), 2281-2289.
6. United States Environmental Protection Agency, Risk Assessment Guidance for Superfund Office of Superfund Remediation and Technology Innovation, Ed. 2009; Vol. I: Human Health Evaluation Manual.
7. Klepeis, N. E.; Nelson, W. C.; Ott, W. R.; Robinson, J. P.; Tsang, A. M.; Switzer, P.; Behar, J. V.; Hern, S. C.; Engelmann, W. H., The National Human Activity Pattern Survey (NHAPS): a resource for assessing exposure to environmental pollutants. *Journal of Exposure Science & Environmental Epidemiology* **2001**, *11* (3), 231-252.
8. United States Environmental Protection Agency, Integrated Risk Information System Assessments. Office of Research and Development, : 2017.
9. United States Environmental Protection Agency, Provisional Peer-Reviewed Toxicity Values (PPRTVs) Assessments. Office of Research and Development,; 2013.
10. California Environmental Protection Agency, Toxic Air Contaminant List with Staff Reports/Executive Summaries. California Office of Environmental Health Hazard Assessment: 2008.
11. United States Environmental Protection Agency, CompTox Chemicals Dashboard. Office of Research and Development,.
12. Oregon Department of Environmental Quality and Oregon Health Authority, Cleaner Air Oregon Toxicity Reference Values. State of Oregon: 2018.
13. United States Environmental Protection Agency, Human Health Toxicity Values in Superfund Risk Assessments Memorandum. Office of Superfund Remediation and Technology Innovation, Ed. 2003.
